# Supplementary material for: Novel quinoxaline-3-propanamides as VGFR-2 inhibitors and apoptosis inducers
Source: Royal Society of Chemistry journal article supplement (doi:10.1039/d3ra05066a), 2023-01-01
Supplement: d3ra05066a1.pdf [file d3ra05066a1.pdf]

**Supplementary Data (Spectral data)**

**Novel Quinoxaline-3-propanamides as VGFR2 Inhibitors and  
Apoptosis Inducers**

Magda M. F. Ismail <sup>a</sup>, Taghreed Z. Shawer <sup>a</sup>, Rabab Said E. <sup>a</sup>, Mostafa S. Abusaiif<sup>b</sup>, Mona M.  
kamal,<sup>c</sup> Rasha M. Allam,<sup>d</sup> Yousry A. Ammar <sup>b</sup>

D-rabab- 5 -D2O

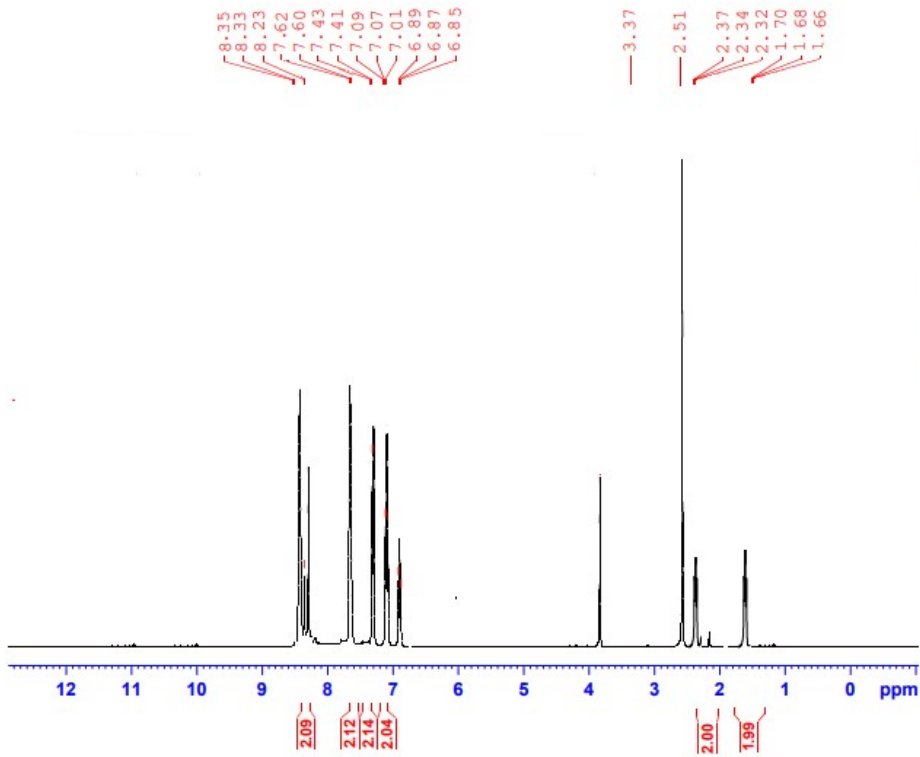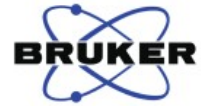

Current Data Parameters  
NAME Rabab Al solid-II-DMSO-d6-  
EXPRO 10  
PROCNO 1

F2 - Acquisition Parameters  
Date\_ 20190318  
Time 10.55 h  
INSTRUM spect  
PROBHD 1HBBB1H 90AS 1  
PULPROG zg30  
TD 65536  
SOLVENT DMSO  
NS 16  
DS 2  
SWH 8012.820 Hz  
FIDRES 0.244532 Hz  
AQ 4.0384602 sec  
RG 158.72  
DM 62.400 usec  
DE 6.50 usec  
TE 293.2 K  
SI 1.00000000 sec  
TDD 1  
SFO1 400.2024712 MHz  
NUC1 1H  
P1 13.50 usec  
PLM1 13.0000000 W

F2 - Processing parameters  
SI 65536  
SF 400.2000000 MHz  
WDW EM  
SSB 0  
LB 0.30 Hz  
GB 0  
PC 1.00

D-rabab- 5 -c13

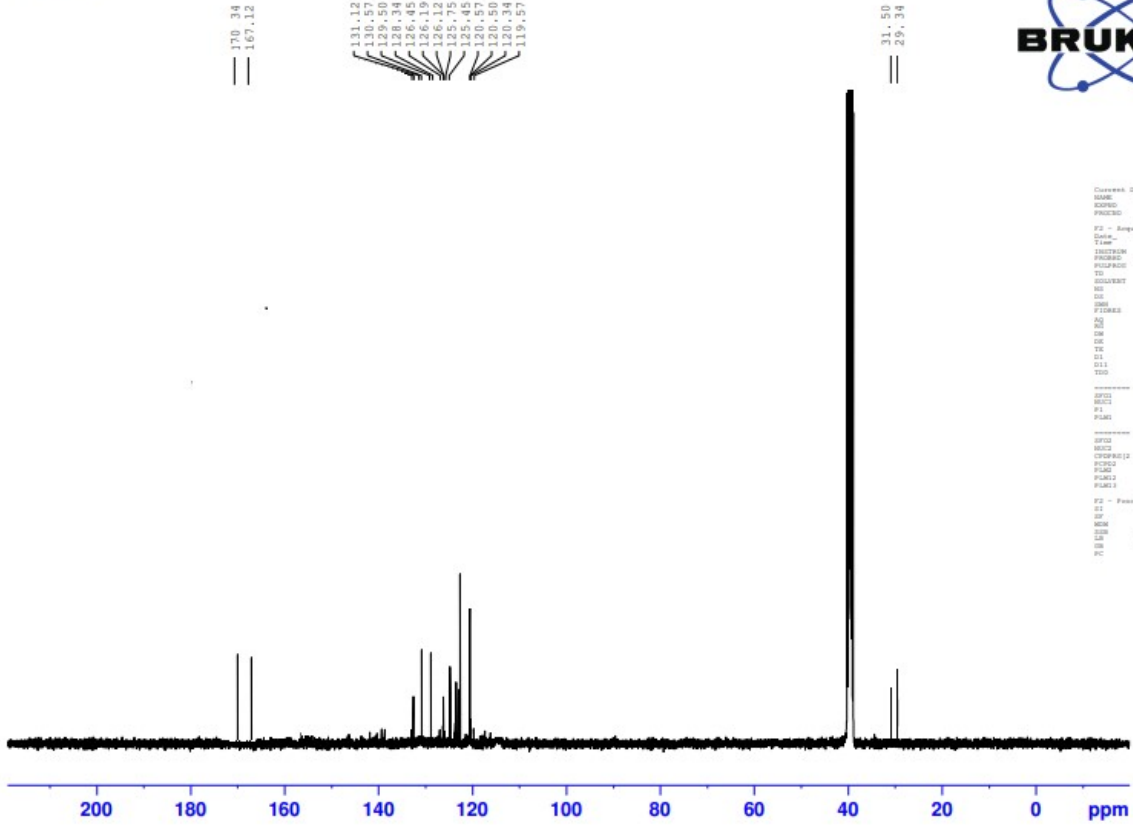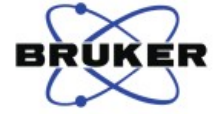

```
Current Data Parameters
NAME: D-rabab-5-c13
EXPNO: 12
PROCNO: 1

F2 - Acquisition Parameters
Date_ : 2011120
Time : 15.10
INSTRUM : spect
PROBHD : 5 mm HBARC BBI
PULPROG : zgpg30
TD : 65536
SOLVENT : DMSO
NS : 8
DS : 4
SWH : 20219.447 Hz
FIDRES : 0.160176 Hz
AQ : 1.3121189 sec
RG : 251.41
DA : 25.800 usec
DE : 6.10 usec
TE : 300.15 K
D1 : 0.30000000 sec
d11 : 0.30000000 sec
TD0 : 1

----- CHANNEL f1 -----
NUC1 : 13C
P1 : 35.00 usec
PL1 : 0.00000000 M

----- CHANNEL f2 -----
NUC2 : 13C
P2 : 35.00 usec
PL2 : 0.00000000 M

F2 - Processing parameters
SI : 32768
SF : 100.628163 MHz
WDW : EM
SSB : 0
LB : 1.00 Hz
GB : 0
PC : 1.00
```

D-rabab-6:-1H

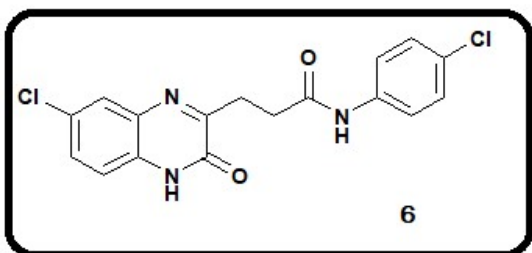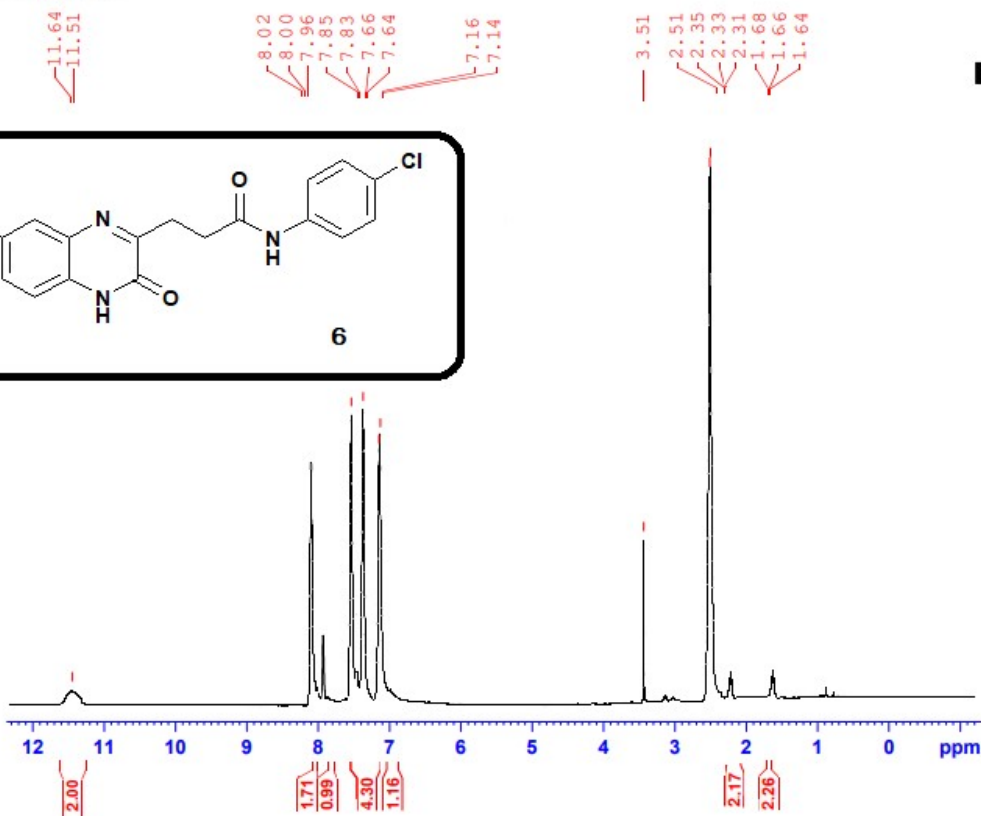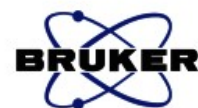

```
Current Data Parameters
NAME: D-rabab-001-10
EXPNO: 10
PROCNO: 1
F2 - Acquisition Parameters
Date_: 20110228
Time: 11.20
INSTRUM: spect
PROBHD: 5 mm PABBO DAI
PULPROG: zg30
TD: 65536
SOLVENT: DMSO
NS: 12
DS: 2
SWH: 8022.400 Hz
FIDRES: 0.222268 Hz
AQ: 4.0976641 sec
RG: 251.41
DE: 62.2000 mm
TE: 300.2 K
DE: 6.30 mm
SI: 1.00000000 sec
TG: 1
===== CHANNEL f1 =====
NUC1: 13C
P1: 16.00
PL1: 0.00000000 Hz
F2 - Processing parameters
SI: 65536
SF: 100.625000 MHz
WDW: EM
SSB: 0
LB: 0.30 Hz
GB: 0
PC: 1.00
```

A  
G

D-rabab' 6 - D2O

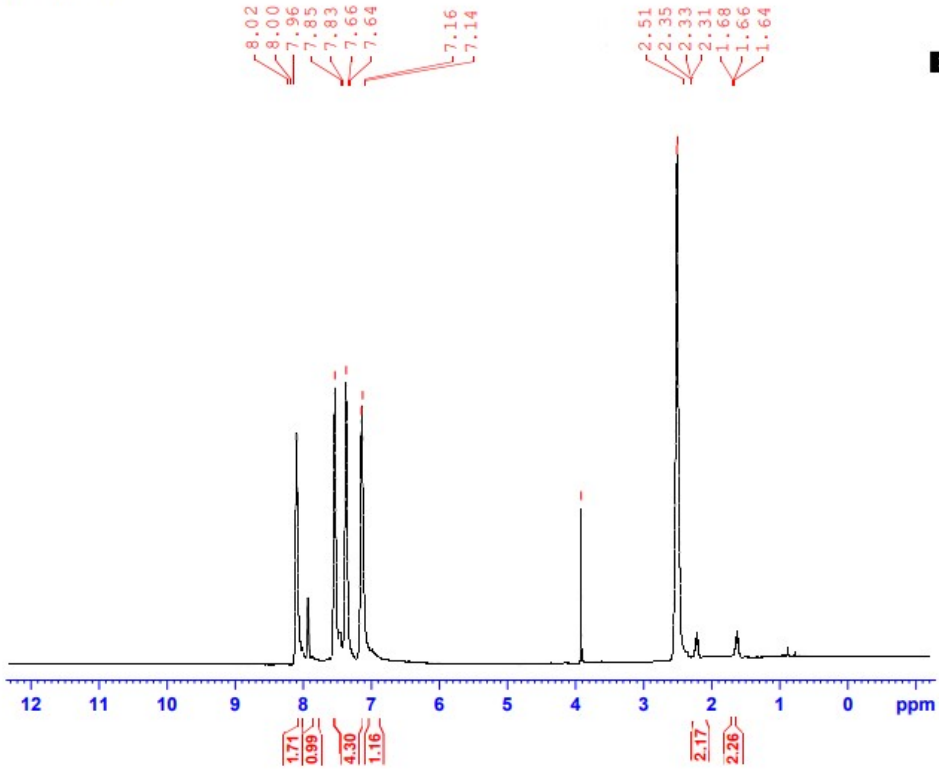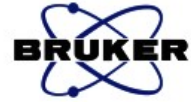

```
===== Data Parameters =====
NAME: D-rabab-03-10
EXPNO: 10
PROCNO: 1
F2 - Acquisition Parameters
Date_: 20111228
Time: 11.20
INSTRUM: spect
PROBHD: 5 mm PABBO BB/
PULPROG: zgpg30
TD: 65536
SOLVENT: DMS
DS: 4
SSB: 0
AQ: 0.013020 Hz
RG: 0.122240 Hz
AQ: 6.281640 sec
RG: 251.81
DS: 82.1200 sec
DE: 0.30 sec
TE: 298.2 K
SI: 1.0000000 sec
TU: 1
===== CHANNEL f1 =====
NUC1: 13C-10131710 MHz
NUC2: 13C-10131710 MHz
P1: 10.00 sec
PL1: 0.0000000 W
F2 - Processing parameters
SI: 65536
SF: 100.6281250 MHz
WDW: EM
SSB: 0
LA: 0.30 Hz
GB: 0
PC: 1.00
```

A  
G

D-rabab- 6 -c13

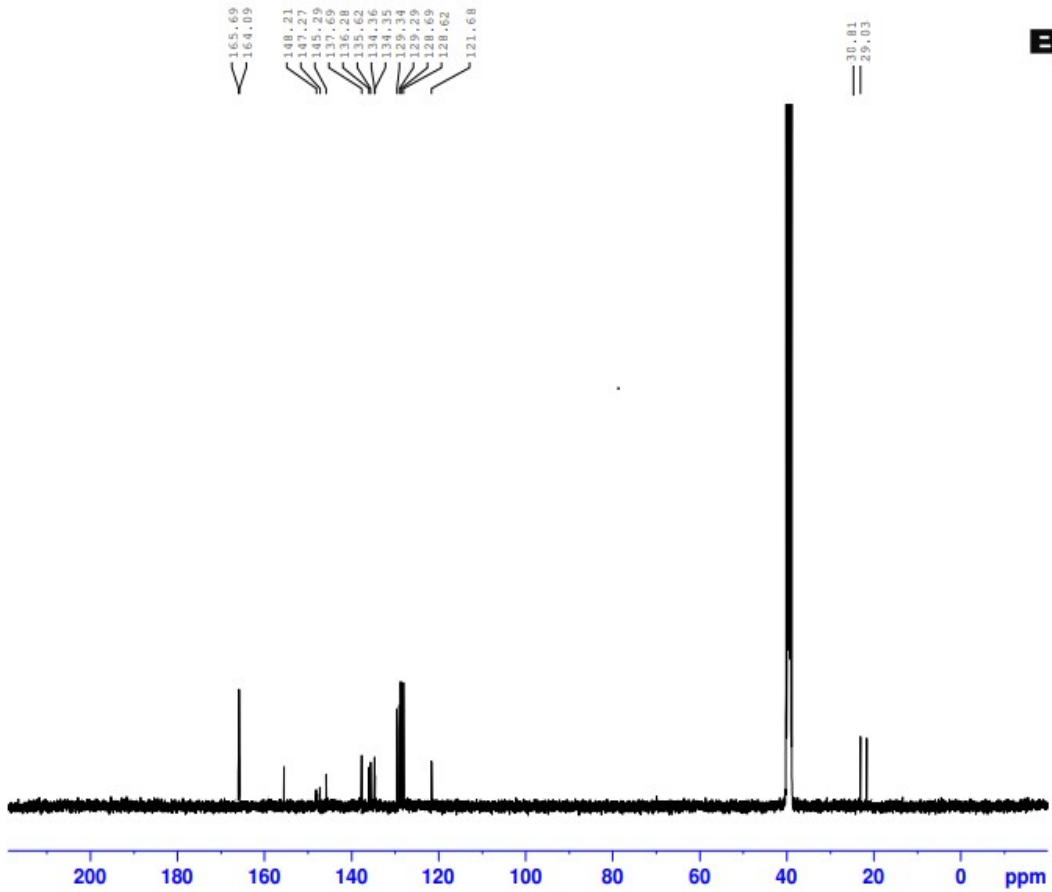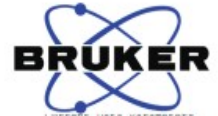

```
Current data parameters
NAME      D-rania-F1-c13
EXPNO     11
PROCNO    1

F2 - Acquisition Parameters
Date_     20210610
Time      15.49
INSTRUM   spect
PROBHD    5 mm PABBO BB/
PULPROG   zgpg30
TD         65536
SOLVENT   DMSO
NS         4000
DS         4
SWS        24038.461 Hz
FIDRES     0.366798 Hz
AQ         1.3631488 sec
RG         201.61
DM         20.800 usec
DE         6.50 usec
TE         298.1 K
D1         2.0000000 sec
D11        0.03000000 sec
TD0        1

----- CHANNEL f1 -----
SFO1      100.628293 MHz
NUC1       13C
P1         10.00 usec
PLM1       50.0000000 W

----- CHANNEL f2 -----
SFO2      400.1316005 MHz
NUC2       1H
PCPPRG2   waltz16
PCPD2     90.00 usec
PLM2      10.39999862 W
PLM3      0.28889000 W
PLM3      0.23400000 W

F2 - Processing parameters
SI         32768
SF         100.6128147 MHz
NMR        EM
SOL         0
LB         1.00 Hz
GB         0
PC         1.40
```

D-rabab- 7 -c13

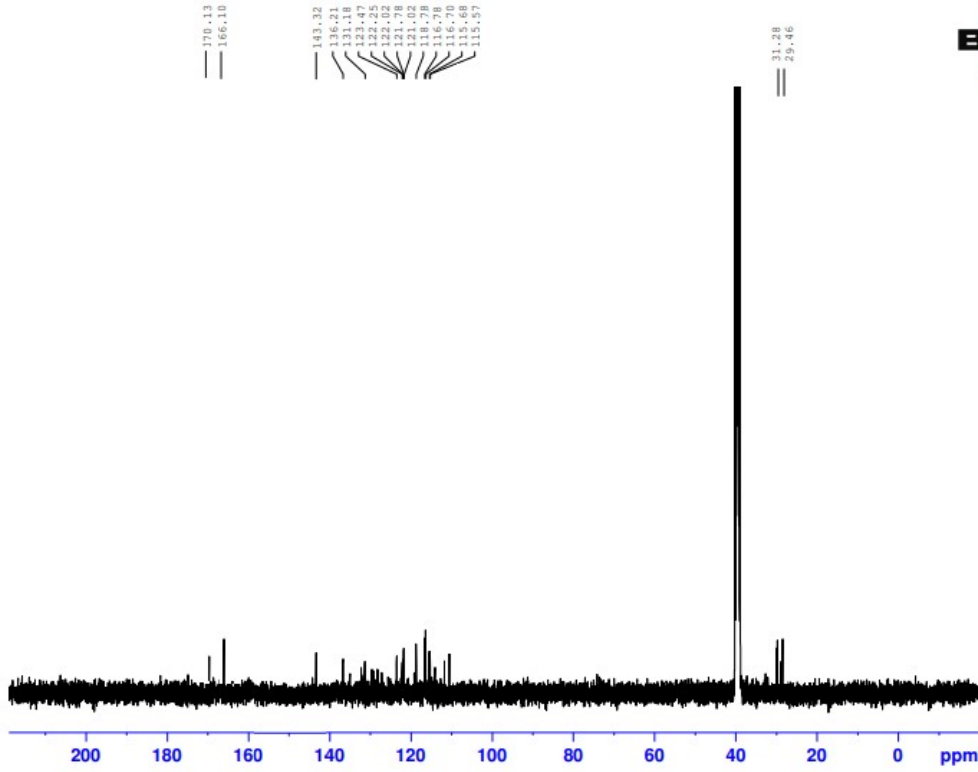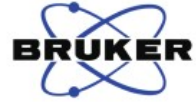

```
=====
CURRENT DATA PARAMETERS
NAME: D-rabab-71-c13
EXPNO: 10
PROCNO: 1
F2 - Acquisition Parameters
DATE_: 201109
TIME: 1.15
INSTRUM: spect
PROBHD: 5 mm PABBO 90
PULPROG: zgpg30
TD: 65536
SOLVENT: DMSO
NS: 5000
DS: 4
SWH: 24000.43 KHz
FREQ0: 101.624790 MHz
RG: 1.021400 MHz
AQ: 201.41
DE: 20.000 uMm
SE: 4.50 uMm
TE: 300.2 K
D1: 2.00000000 sec
d11: 0.20000000 sec
TD0: 1
===== CHANNEL f1 =====
NUC1: 13C-0131303 MHz
P1: 12.00 uMm
PL1: 00.00000000 W
===== CHANNEL f2 =====
NUC2: 1H
CPDPRG2: waltz16
PCPD2: 90.00 uMm
P12: 10.10000000 W
PL12: 0.20000000 W
PL13: 0.20000000 W
F2 - Processing parameters
SI: 32768
SF: 100.628142 MHz
WDW: EM
SSB: 0
LB: 1.00 KHz
GB: 0
PC: 1.40
```

D-rabab- 8 :-H

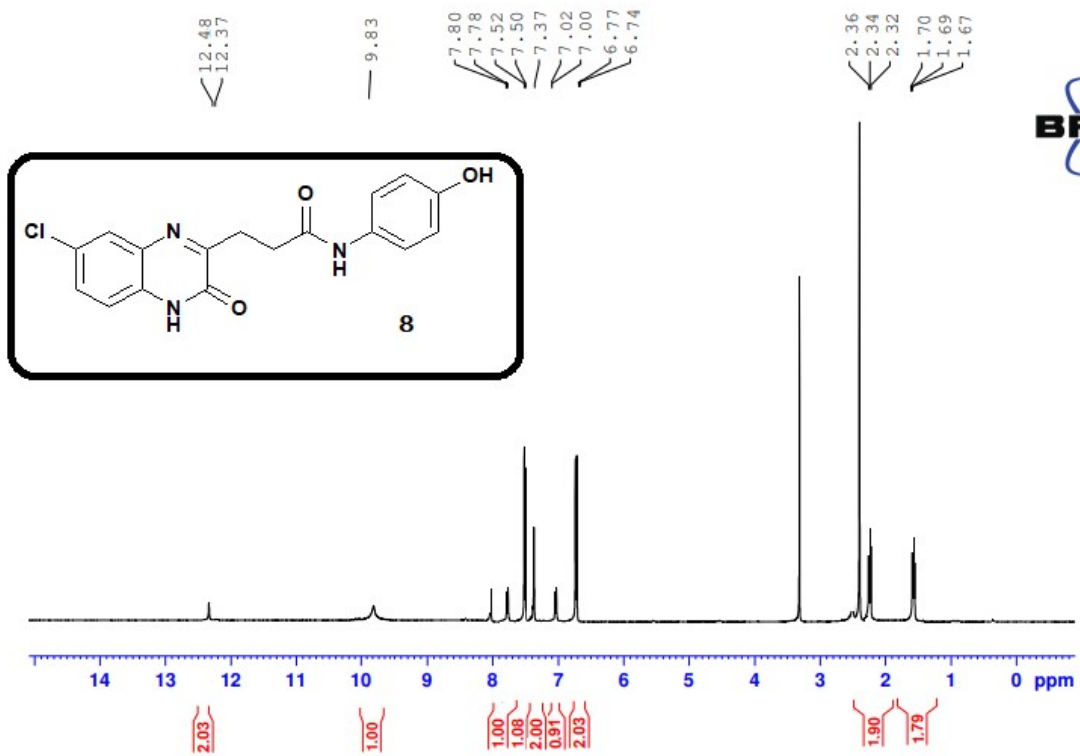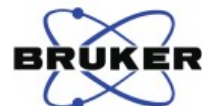

Current Date Parameters  
Date\_ 20211229  
Time 11:41:00  
F2 - Acquisition Parameters  
Date\_ 20211229  
Time 11:41:00  
PROCNO 1  
EXPNO 2  
PROCPS 1.00  
SOLVENT H<sub>2</sub>O  
NS 32  
DS 4  
SWH 6012.425 Hz  
FIDRES 0.122264 Hz  
AQ 0.001645 Hz  
RG 381.25  
SQ 60.40 Hz  
AQ 0.001645 Hz  
RG 381.25  
SQ 60.40 Hz  
SI 1  
SF 500.1362000 MHz  
SD 1.000000000 Hz  
===== CHANNEL f1 =====  
NUC1 13C  
PULPROG zgpg30  
PC 12.00000000 MHz  
===== CHANNEL f2 =====  
NUC2 1H  
PULPROG zgpg30  
PC 12.00000000 MHz



D-rabab- 8 -D2O

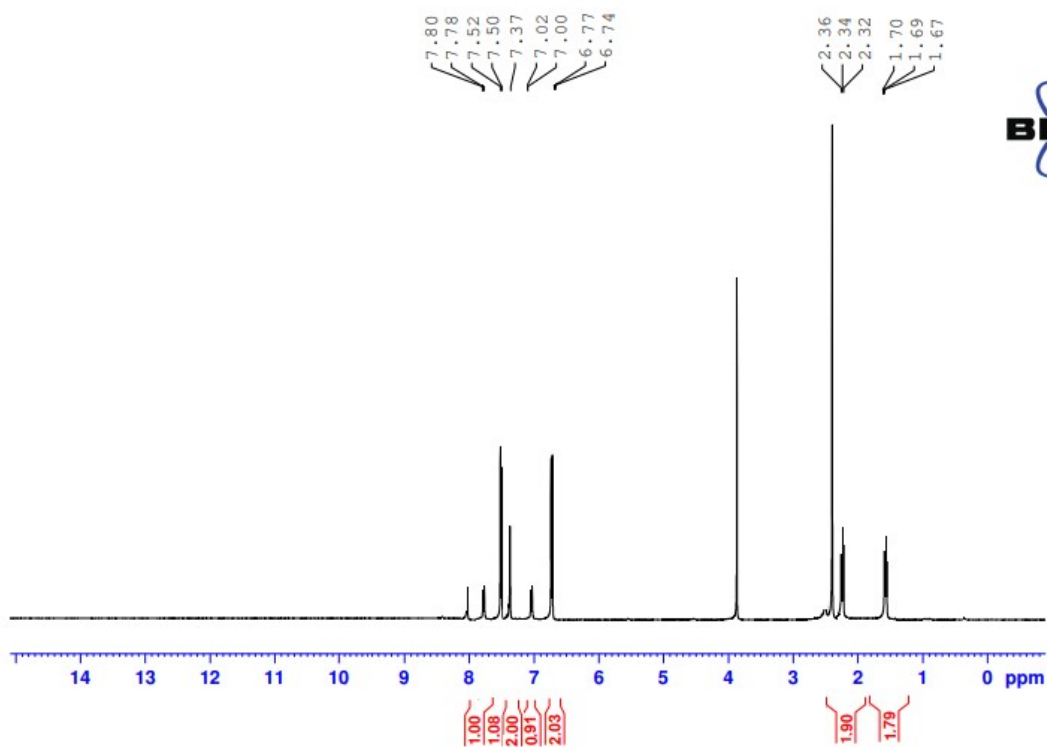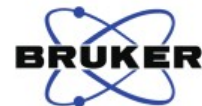

```
Current Data Parameters
NAME: D-rabab-8-D2O
EXPNO: 2
PROCNO: 1
F2 - Acquisition Parameters
Date_ 201208
Time: 11:49
PROBHD: 5 mm PABBO 50
PULPROG: zgpg30
PCPDPRG2: waltz16
SOLVENT: DMSO
NS: 512
DS: 4
SWH: 802.820 Hz
FIDRES: 0.320000 Hz
AQ: 0.000312 Hz
RG: 384.00
DE: 0.000000
TE: 300.2 K
NUC1: 13C
NUC2: 13C
===== CHANNEL f1 =====
NUC1: 13C
P1: 12.00
PL1: 0.0000000 Hz
F2 - Processing parameters
SI: 32768
SF: 400.1460000 MHz
WDW: EM
SSB: 0
LB: 0.000000 Hz
GB: 0
PC: 0.000000
FT: 1.00
```

D-rabab- 8 -c13

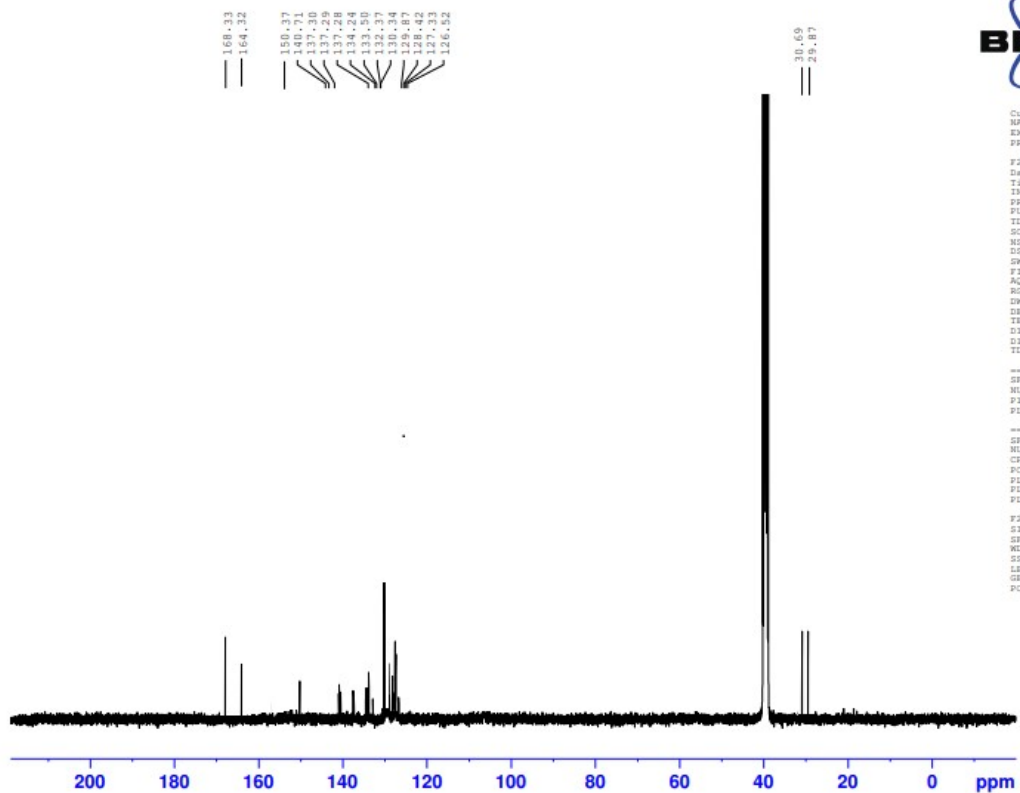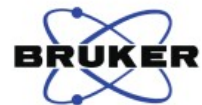

Current Data Parameters  
NAME G-rania-SM-c13  
EXPHO 10  
PROCNO 1

F2 - Acquisition Parameters  
Date\_ 20210809  
Time\_ 15.04  
INSTRUM spect  
PROBHD 5 mm F400 SBL  
PULPROG zgpg30  
TD 65536  
SOLVENT DMG0  
NS 3000  
DS 4  
SWH 24038.461 Hz  
FIDRES 0.366798 Hz  
AQ 1.3631888 sec  
RG 201.61  
EW 20.800 usec  
DE 6.10 usec  
TE 299.6 K  
D1 2.0000000 sec  
D11 0.0300000 sec  
TD0 1

===== CHANNEL f1 =====  
SFO1 100.628293 MHz  
NUC1 13C  
P1 10.00 usec  
PLW1 50.0000000 W

===== CHANNEL f2 =====  
SFO2 400.1316005 MHz  
NUC2 1H  
CPOBPG12 waltz16  
PCPD2 90.00 usec  
PLW2 10.39999962 W  
PLW12 0.28895000 W  
PLW13 0.23400000 W

F2 - Processing parameters  
SI 32768  
SF 100.6128149 MHz  
WDW EM  
SSB 0  
LB 1.00 Hz  
GB 0  
PC 1.40

D-rabab- 9 -c13

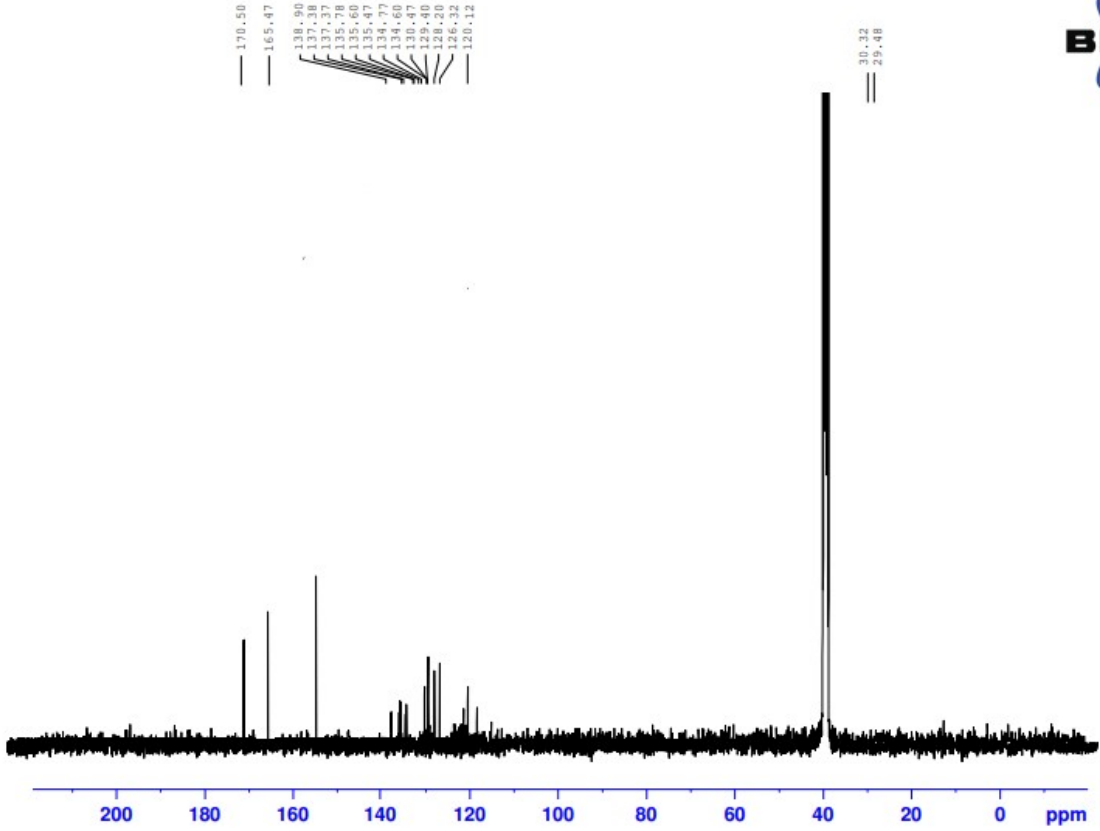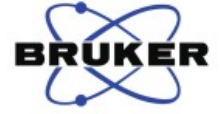

```
----- CHANNEL F1 -----
NAME      D-rabab-P15-c13
EXPNO     10
PROCNO    1
----- CHANNEL F2 -----
P2 - Acquisition Parameters
NAME_2    20211023
TIME_2    13.42
INSTRUM   spect
PROBHD    5 mm PABBO MM/
PULPROG   zgpg30
TD         65536
SOLVENT   DMSO
NS         2050
DS         4
SWH        24230.461 Hz
FIDRES     0.264796 Hz
AQ         1.1421468 sec
RG         201.61
DE         20.850 usec
TE         300.2 K
DE         4.50 usec
TE        298.1 K
SI         2.00000000 sec
SFO        100.6228293 MHz
TSS        1
----- CHANNEL F3 -----
NAME      13C
EXPNO     10
PROCNO    10
PULPROG   zgpg30
TD         65536
SOLVENT   DMSO
NS         2050
DS         4
SWH        24230.461 Hz
FIDRES     0.264796 Hz
AQ         1.1421468 sec
RG         201.61
DE         20.850 usec
TE         300.2 K
DE         4.50 usec
TE        298.1 K
SI         2.00000000 sec
SFO        100.6228293 MHz
TSS        1
----- CHANNEL F4 -----
NAME      13C
EXPNO     10
PROCNO    10
PULPROG   zgpg30
TD         65536
SOLVENT   DMSO
NS         2050
DS         4
SWH        24230.461 Hz
FIDRES     0.264796 Hz
AQ         1.1421468 sec
RG         201.61
DE         20.850 usec
TE         300.2 K
DE         4.50 usec
TE        298.1 K
SI         2.00000000 sec
SFO        100.6228293 MHz
TSS        1
```

D-rabab-10 -D2O

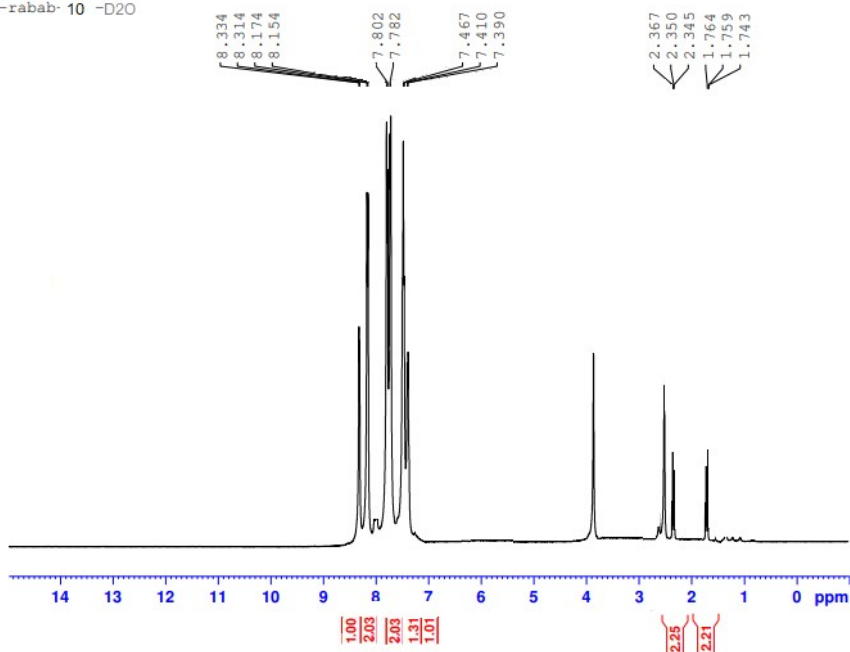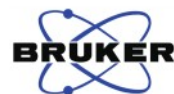

```
Current Data Parameters
NAME D-rabab-10-D2O
EXPNO 10
PROCNO 1
F2 - Acquisition Parameters
Date_ 20211218
Time 11:09
INSTRUM spect
PROBHD 5 mm PABBO BB/
PULPROG zg30
TD 65536
SOLVENT DMSO
NS 2
DS 16
SWH 8012.800 Hz
FIDRES 0.122266 Hz
AQ 4.0894465 sec
RG 39
DM 62.400 usec
DE 6.30 usec
TE 298.2 K
D1 1.00000000 sec
TD0 1
===== CHANNEL f1 =====
NUC1 400.1324710 MHz
P1 15.00 usec
PL1 10.39999962 dB
F2 - Processing parameters
SI 65536
SF 400.1300044 MHz
WDW EM
SSB 0
LB 0.30 Hz
GB 0
PC 1.00
```

D-rabab-10 -1H1

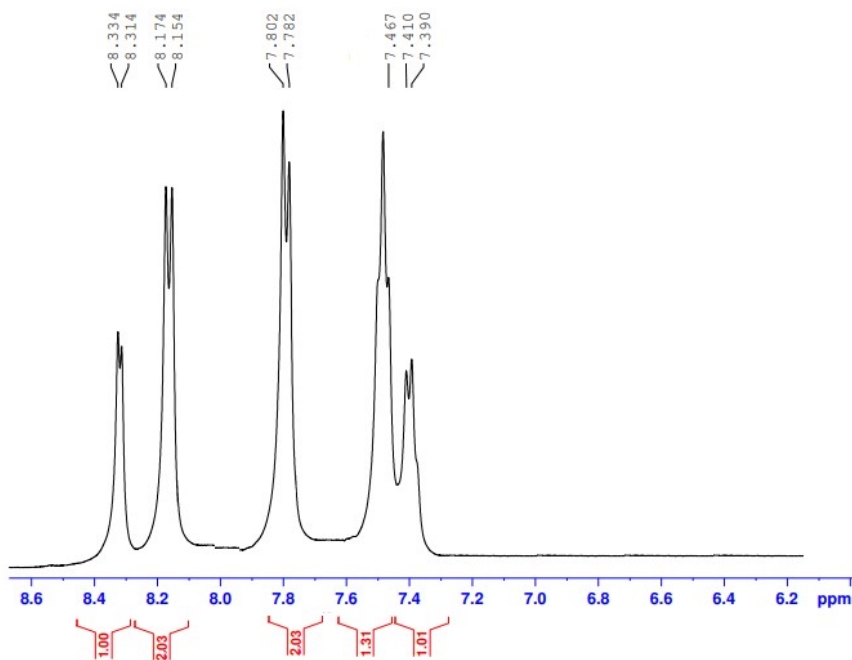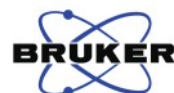

```
Current Data Parameters
NAME D-rabab-10-D2O
EXPNO 10
PROCNO 1
F2 - Acquisition Parameters
Date_ 20211218
Time 11:09
INSTRUM spect
PROBHD 5 mm PABBO BB/
PULPROG zg30
TD 65536
SOLVENT DMSO
NS 2
DS 16
SWH 8012.800 Hz
FIDRES 0.122266 Hz
AQ 4.0894465 sec
RG 39
DM 62.400 usec
DE 6.30 usec
TE 298.2 K
D1 1.00000000 sec
TD0 1
===== CHANNEL f1 =====
NUC1 400.1324710 MHz
P1 15.00 usec
PL1 10.39999962 dB
F2 - Processing parameters
SI 65536
SF 400.1300044 MHz
WDW EM
SSB 0
LB 0.30 Hz
GB 0
PC 1.00
```

Activat  
Go to Se

D-rabab-10 -c13

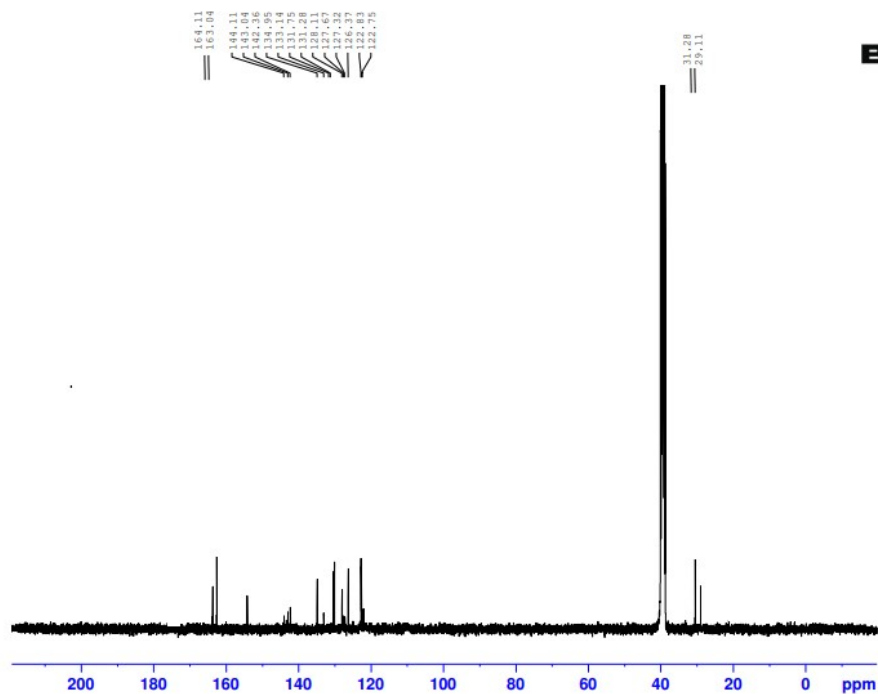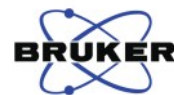

```

Current Data Parameters
NAME      D-rabab-7-c13
EXPNO    10
PROCNO   1

F2 - Acquisition Parameters
Date_    20220116
Time     3.23
INSTRUM  spect
PROBHD   5 mm PABBO BB/
PULPROG  zgpg30
TD        65536
SOLVENT  DMSO
NS        4
DS        4
SWH       24018.461 Hz
FIDRES   0.164750 Hz
AQ        1.3631488 sec
RG        511.61
SR        20.800 usec
DE        4.50 usec
TE        298.1 K
D1        2.0000000 sec
d11       0.0300000 sec
TD0       1

===== CHANNEL f1 =====
SFO1     100.628253 MHz
NUC1     13C
P1        10.00 usec
PLW1     50.0000000 W

===== CHANNEL f2 =====
SFO2     400.1514005 MHz
NUC2     1H
PCPDG12  wait16
PCPD2    90.00 usec
PLW2     10.3999962 W
PLW3     0.2889000 W
PLW4     0.2889000 W

F2 - Processing parameters
SI        32768
SF        100.6178712 MHz
WDW       0
SSB       0
LB        1.00 Hz
GB        0
PC        1.40

```

D-rabab-11 -1H

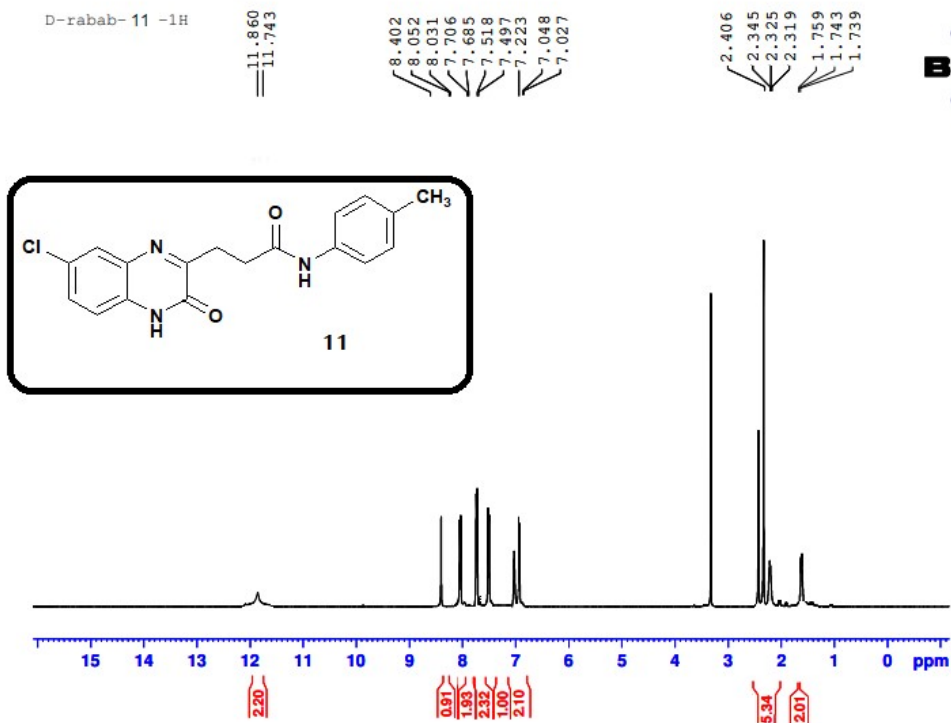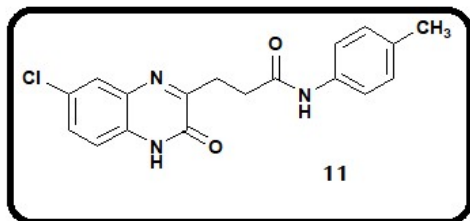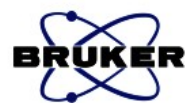

```

Current Data Parameters
NAME      D-rabab-10-c13
EXPNO    10
PROCNO   1

F2 - Acquisition Parameters
Date_    20211128
Time     15.04
INSTRUM  spect
PROBHD   5 mm PABBO BB/
PULPROG  zgpg30
TD        65536
SOLVENT  DMSO
NS        4
DS        4
SWH       4012.820 Hz
FIDRES   0.132260 Hz
AQ        4.0594461 sec
RG        201.61
SR        42.400 usec
DE        4.50 usec
TE        298.1 K
D1        1.6000000 sec
TD0       1

===== CHANNEL f1 =====
SFO1     400.1328718 MHz
NUC1     1H
P1        10.00 usec
PLW1     10.3999962 W

F2 - Processing parameters
SI        32768
SF        400.1328712 MHz
WDW       0
SSB       0
LB        0.50 Hz
GB        0
PC        1.00

```

D-rabab-11 -D2O

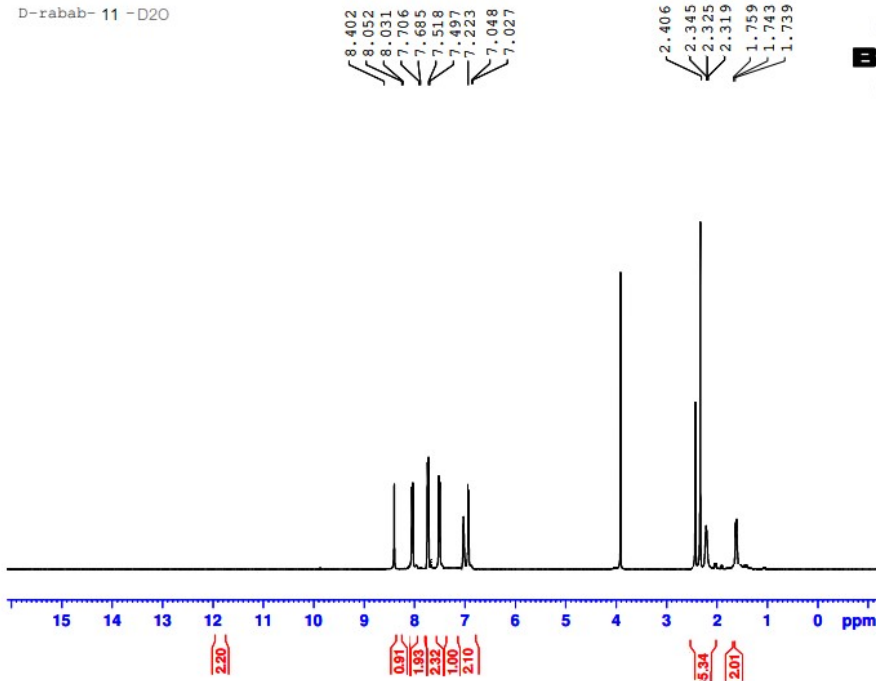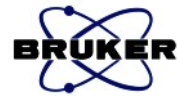

```

Current Data Parameters
NAME: D-rabab-11-D2O
EXPNO: 12
PROCNO: 1
F2 - Acquisition Parameters
Date_ : 20211204
Time : 11.04
INSTRUM : spect
PROBHD : 5 mm PABBO AB/
PULPROG : zgpg30
TD : 65536
SOLVENT : DMSO
NS : 14
DSB : 0
AQ : 8012.400 Hz
FREQZ : 5.022546 Hz
RG : 4.000000 sec
AQ : 201.41
DE : 47.400 umm
DE : 4.50 umm
TE : 300.2 K
D1 : 1.6000000 sec
TD0 :
----- CHANNEL f1 -----
NUC1 : 13C
P1 : 15.00 umm
PCPD : 10.3000000 M
F2 - Processing parameters
SI : 32768
SF : 400.1300000 MHz
WDW : EM
SSB : 0
GB : 0
PC : 1.00
  
```

D-rabab-11 -c13

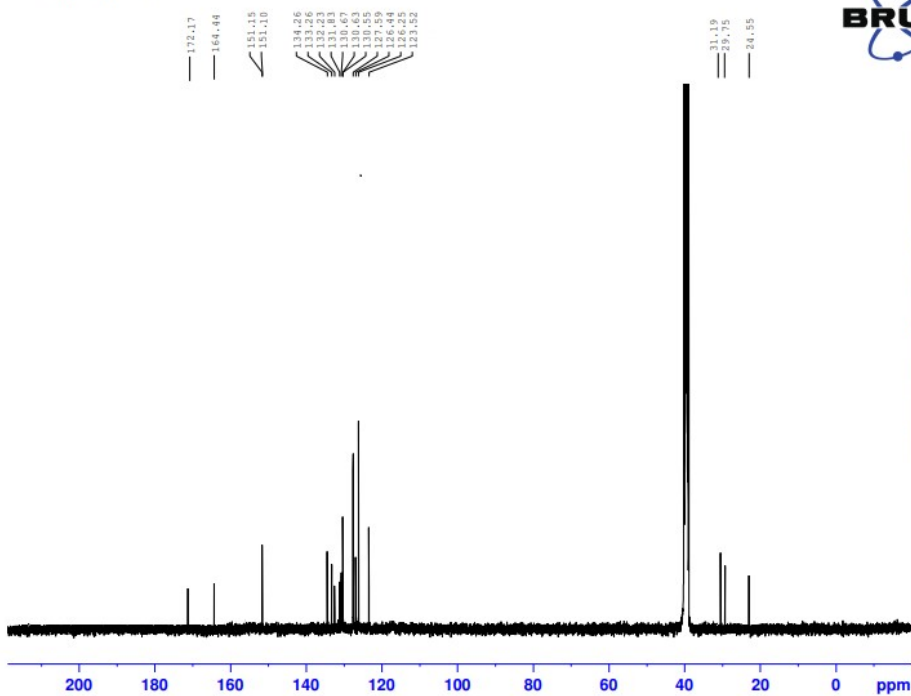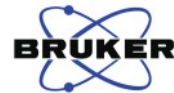

```

Current Data Parameters
NAME: D-rabab-11-c13
EXPNO: 11
PROCNO: 1
F2 - Acquisition Parameters
Date_ : 20211205
Time : 9.27
INSTRUM : spect
PROBHD : 5 mm PABBO AB/
PULPROG : zgpg30
TD : 65536
SOLVENT : DMSO
NS : 8
DSB : 0
AQ : 2438.441 Hz
FREQZ : 125.76034 Hz
RG : 201.41
DE : 20.400 umm
DE : 4.50 umm
TE : 300.2 K
D1 : 2.0000000 sec
D11 : 0.0000000 sec
TD0 : 0.0000000 sec
----- CHANNEL f1 -----
NUC1 : 13C
P1 : 15.00 umm
PCPD : 10.3000000 M
F2 - Processing parameters
SI : 32768
SF : 125.76034 MHz
WDW : EM
SSB : 0
GB : 0
PC : 1.00
  
```

D-rabab- 12 -1H

11.215  
11.204

8.120  
8.099  
7.967  
7.843  
7.823  
7.715  
7.519  
7.497  
7.215  
7.210  
7.196  
6.653  
6.633

2.411  
2.343  
2.323  
2.314  
1.745  
1.725  
1.715

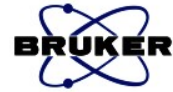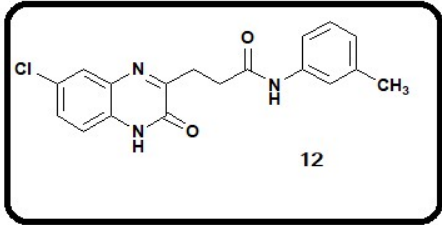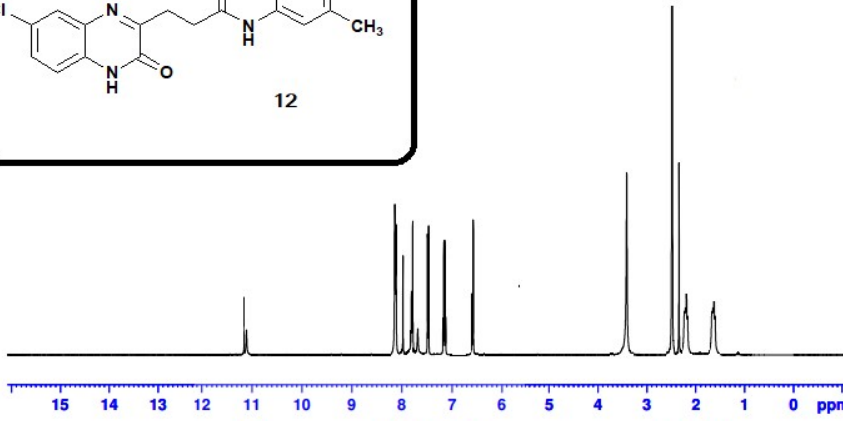

1.89

1.00  
2.03  
1.01  
1.31  
1.01

2.96  
1.95  
2.12

Current Data Parameters  
NAME: D-rabab-12-1H  
EXPNO: 1  
PROCNO: 1

F2 - Acquisition Parameters  
Date\_: 20211228  
Time: 11.04  
INSTRUM: spect  
PROBHD: 5 mm PABBO 400  
PULPROG: zg30  
TD: 65536  
SOLVENT: DMSO  
NS: 15  
DS: 4  
SWH: 8012.820 Hz  
FREQ0: 400.12546 MHz  
AQ: 4.5884445 sec  
RG: 201.41  
SQ: 42.400 umax  
SE: 4.50 umax  
TE: 298.1 K  
D1: 1.5000000 sec  
TD0: 1

----- CHANNEL f1 -----  
NUC1: 13C  
P1: 15.00 umax  
PL1: 10.3900000 dB  
F2 - Processing parameters  
SI: 32768  
SF: 400.1300533 MHz  
WDW: 0  
SSB: 0  
LB: 0 0.30 Hz  
GB: 0  
PC: 1.00

D-rabab- 12 -D2O

8.120  
8.099  
7.967  
7.843  
7.823  
7.715  
7.519  
7.497  
7.215  
7.210  
7.196  
6.653  
6.633

2.411  
2.343  
2.323  
2.314  
1.745  
1.725  
1.715

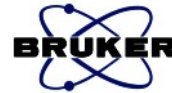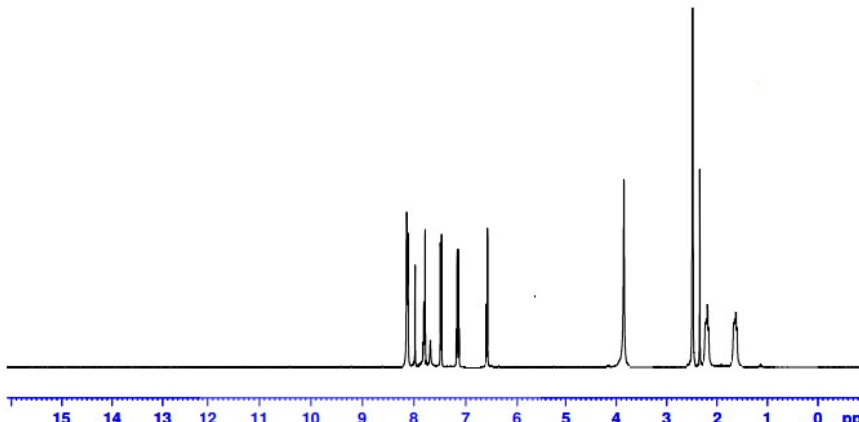

1.00  
2.03  
1.01  
1.31  
1.01

2.96  
1.95  
2.12

Current Data Parameters  
NAME: D-rabab-12-1H  
EXPNO: 1  
PROCNO: 1

F2 - Acquisition Parameters  
Date\_: 20211228  
Time: 11.04  
INSTRUM: spect  
PROBHD: 5 mm PABBO 400  
PULPROG: zg30  
TD: 65536  
SOLVENT: DMSO  
NS: 15  
DS: 4  
SWH: 8012.820 Hz  
FREQ0: 400.12546 MHz  
AQ: 4.5884445 sec  
RG: 201.41  
SQ: 42.400 umax  
SE: 4.50 umax  
TE: 298.1 K  
D1: 1.5000000 sec  
TD0: 1

----- CHANNEL f1 -----  
NUC1: 13C  
P1: 15.00 umax  
PL1: 10.3900000 dB  
F2 - Processing parameters  
SI: 32768  
SF: 400.1300533 MHz  
WDW: 0  
SSB: 0  
LB: 0 0.30 Hz  
GB: 0  
PC: 1.00

D-rabab-12 -c13

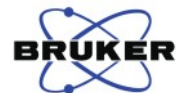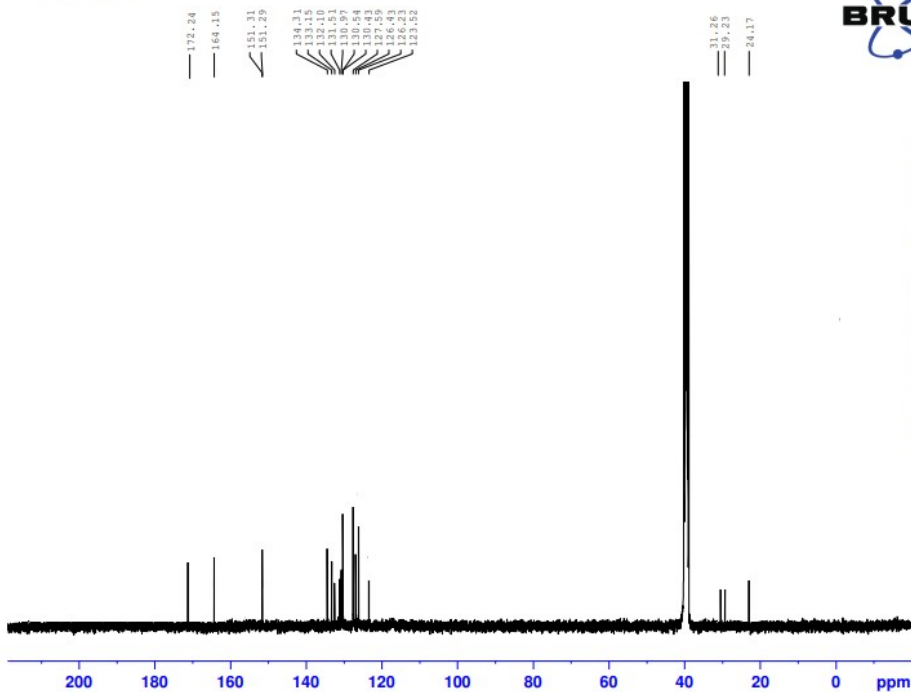

Current Data Parameters  
 NAME: D-rabab-12-c13  
 EXPNO: 1  
 PROCNO: 1  
 F2 - Acquisition Parameters  
 Date\_ : 2011229  
 Time : 8.57  
 INSTRUM : spect  
 PULPROG : zgpg30  
 PRGPROG : 5 mm PABBO 90v  
 TD : 65536  
 SOLVENT : DMSO  
 NS : 1024  
 DS : 4  
 SWH : 24594.884 Hz  
 FIDRES : 2.86476 Hz  
 AQ : 1.0010486 sec  
 RG : 321.41  
 IN : 20.400 usec  
 DE : 6.10 usec  
 TE : 300.2 K  
 D1 : 0.0000000 sec  
 d11 : 0.0000000 sec  
 TD0 : 1  
 ===== CHANNEL f1 =====  
 NUCL1 : 13C  
 P1 : 15.00 usec  
 PL1 : 0.0000000 W  
 ===== CHANNEL f2 =====  
 NUCL2 : 1H  
 P2 : 15.00 usec  
 PL2 : 0.0000000 W  
 ===== CHANNEL f3 =====  
 NUCL3 : 1H  
 P3 : 15.00 usec  
 PL3 : 0.0000000 W  
 F2 - Processing parameters  
 SI : 32768  
 SF : 100.6261000 MHz  
 DM : 0  
 EN : 0  
 LA : 0 1.00 Hz  
 GB : 0 1.00 Hz  
 PC : 1.00

D-rabab-13 -1H

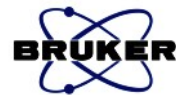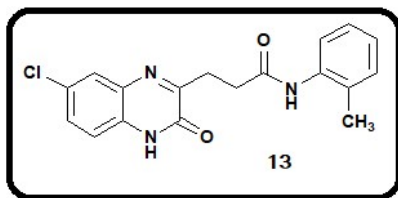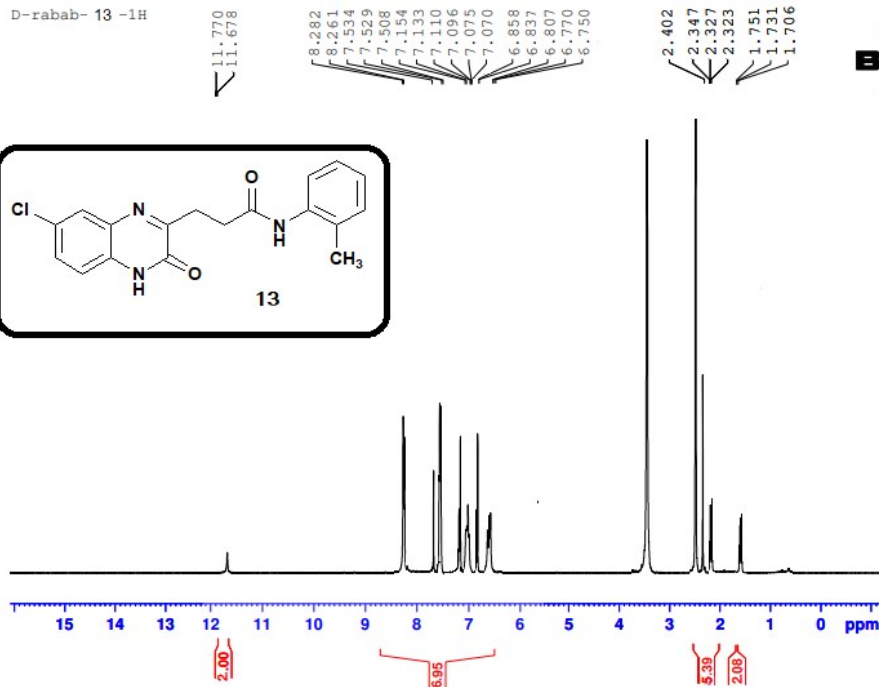

Current Data Parameters  
 NAME: D-rabab-13-1H  
 EXPNO: 10  
 PROCNO: 1  
 F2 - Acquisition Parameters  
 Date\_ : 2011229  
 Time : 11.04  
 INSTRUM : spect  
 PULPROG : zgpg30  
 PRGPROG : 5 mm PABBO 90v  
 TD : 65536  
 SOLVENT : DMSO  
 NS : 1024  
 DS : 4  
 SWH : 8012.800 Hz  
 FIDRES : 0.122204 Hz  
 AQ : 4.080445 sec  
 RG : 321.41  
 IN : 42.400 usec  
 DE : 6.10 usec  
 TE : 300.2 K  
 D1 : 1.0000000 sec  
 TD0 : 1  
 ===== CHANNEL f1 =====  
 NUCL1 : 1H  
 P1 : 15.00 usec  
 PL1 : 10.3999990 W  
 ===== CHANNEL f2 =====  
 NUCL2 : 13C  
 P2 : 15.00 usec  
 PL2 : 0.0000000 W  
 F2 - Processing parameters  
 SI : 32768  
 SF : 400.1100011 MHz  
 DM : 0  
 EN : 0  
 LA : 0 0.30 Hz  
 GB : 0 1.00 Hz  
 PC : 1.00



D-rabab-13 -D2O

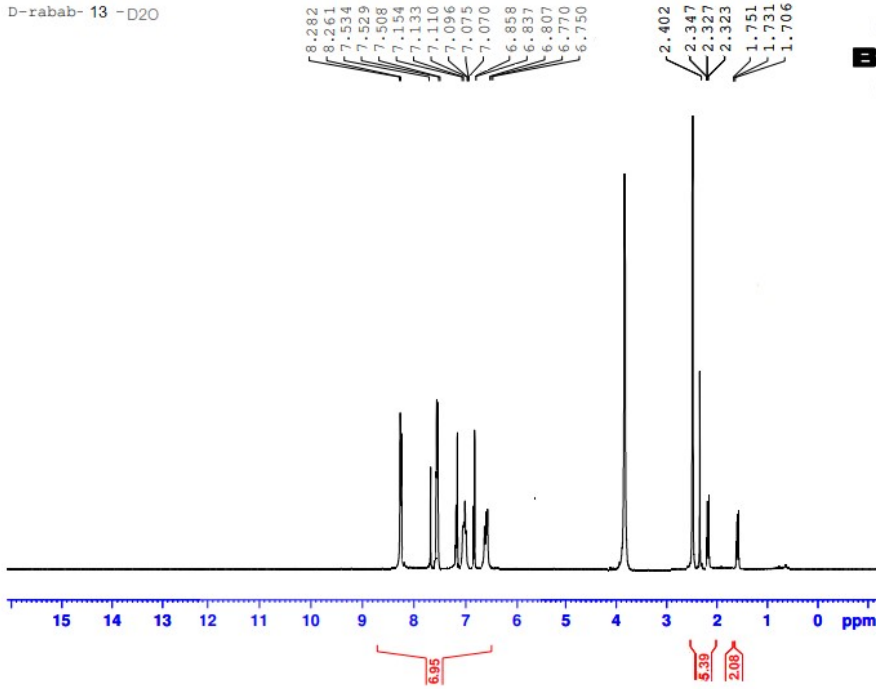

```
Current Data Parameters
NAME D-rabab-13-D2O
EXPNO 20211204
PROCNO 1
F2 - Acquisition Parameters
Date_ 20211204
Time 11.04
INSTRM spect
PROBHD 5 mm PABBO BB/
PULPROG zgpg30
TD 65536
SOLVENT DMSO
NS 16
DS 4
SFO1 400.132410 MHz
AQ 0.122244 sec
RG 201.41
DE 6.50 usec
TE 298.2 K
D1 1.6000000 sec
TD0 1
===== CHANNEL f1 =====
SFO1 400.132410 MHz
NUC1 13
P1 10.00 usec
PLW1 10.3989982 W
F2 - Processing parameters
SI 32768
SF 400.1305013 MHz
WDW EM
SSB 0
LB 0.30 Hz
GB 0
PC 1.00
```

D-rabab-13 -c13

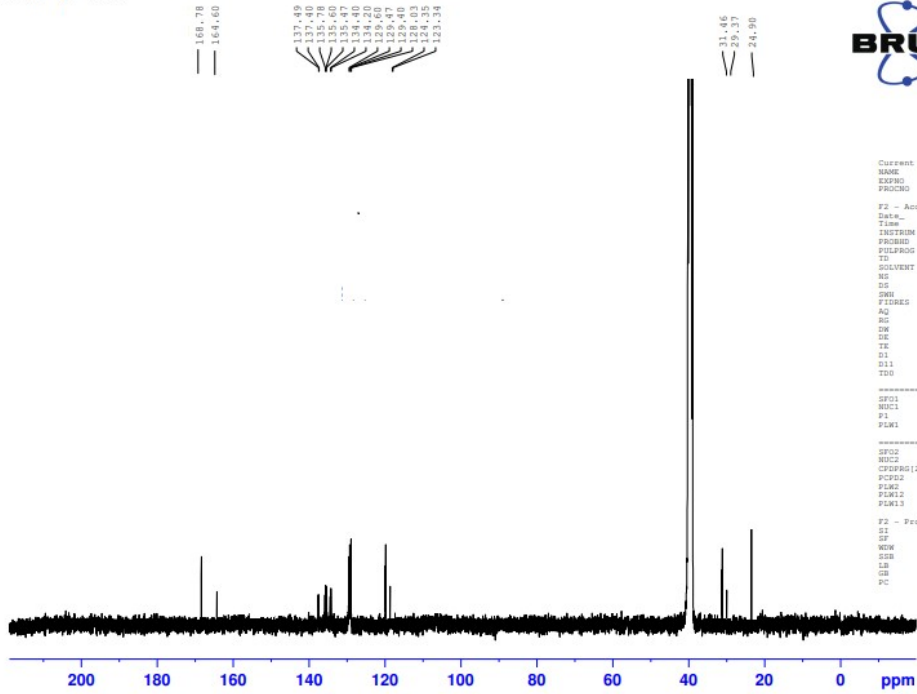

```
Current Data Parameters
NAME D-rabab-13-c13
EXPNO 20
PROCNO 1
F2 - Acquisition Parameters
Date_ 20210903
Time 8.53
INSTRM spect
PROBHD 5 mm PABBO BB/
PULPROG zgpg30
TD 65536
SOLVENT DMSO
NS 16000
DS 4
SFO1 100.628293 MHz
AQ 1.3631488 sec
RG 201.41
DE 6.50 usec
TE 298.2 K
D1 2.0000000 sec
D11 0.0300000 sec
TD0 1
===== CHANNEL f1 =====
SFO1 100.628293 MHz
NUC1 13
P1 10.00 usec
PLW1 95.0000000 W
===== CHANNEL f2 =====
SFO2 400.1314000 MHz
NUC2 13
CPDPRG2 waltz16
PCPD2 90.00 usec
PLW2 10.3989982 W
PLW12 0.2889000 W
PLW13 0.2340000 W
F2 - Processing parameters
SI 32768
SF 100.6128151 MHz
WDW EM
SSB 0
LB 1.00 Hz
GB 0
PC 1.40
```

D-rabab- 14 -1H

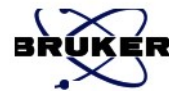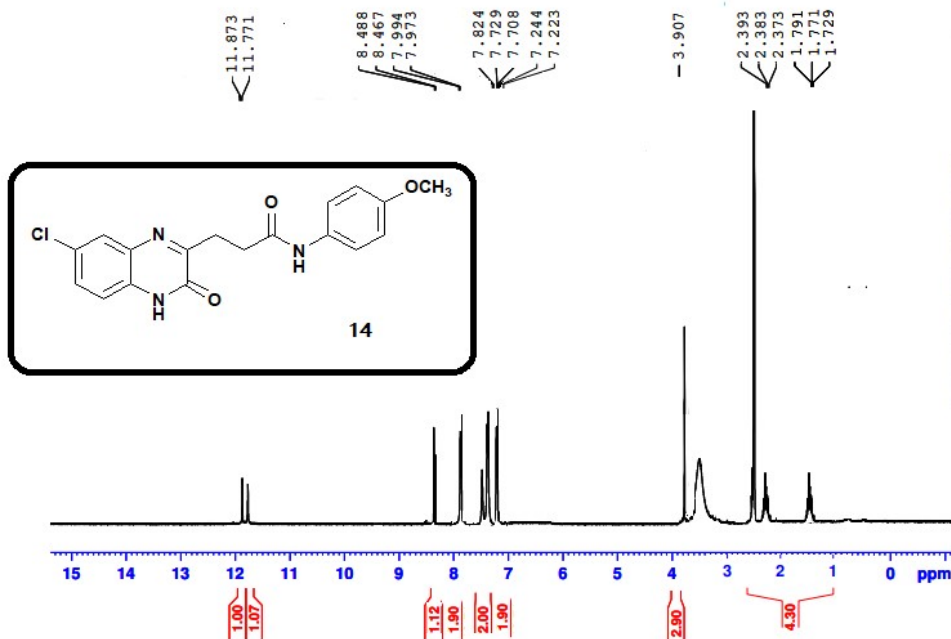

```

Current Data Parameters
NAME: D-rabab-14-1
EXPNO: 1
PROCNO: 1
F2 - Acquisition Parameters
Date_ : 201311
Time : 11.15
INSTRUM : spect
PROBHD : 5 mm VNP4001
PULPROG : zgpg30
TD : 65536
SOLVENT : DMSO
NS : 16
DS : 4
SWH : 6012.625 kHz
FIDRES : 0.122264 Hz
AQ : 4.028263 sec
RG : 201.000
DE : 62.000 umsec
TE : 284.2 K
D1 : 2.0000000 sec
d11 : 0.0300000 sec
TD0 : 1
SFO1 : 100.6404331 MHz
NUC1 : 13C
P1 : 16.00 umsec
PLW1 : 47.0000000 W
SFO2 : 400.1418008 MHz
NUC2 : 1H
PCPD2 : 90.00 umsec
PLW2 : 13.0000000 W
PLW12 : 0.29249999 W
PLW13 : 0.14713000 W
F2 - Processing parameters
SI : 32768
SF : 100.6303700 MHz
WDW : EM
SSB : 0
LB : 1.00 Hz
GB : 0
PC : 1.00
  
```

Rabab -14 - C13

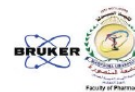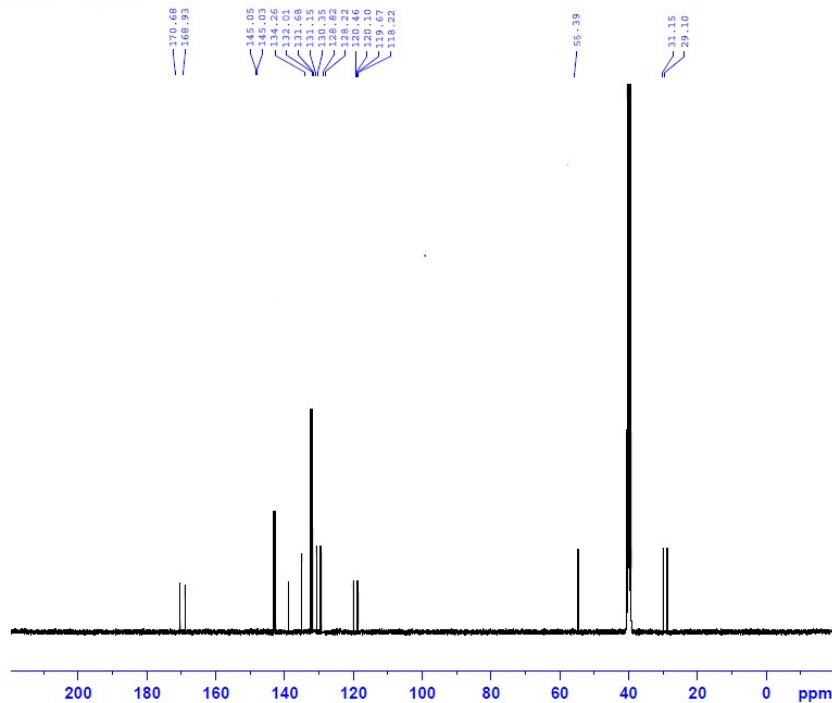

```

Current Data Parameters
NAME: Rabab Al Said -M1- Cmr-DMDO-8
EXPNO: 1
PROCNO: 1
F2 - Acquisition Parameters
Date_ : 20130318
Time : 14.15 h
INSTRUM : spect
PROBHD : Z106618.0945 I
PULPROG : zgpg30
TD : 65536
SOLVENT : DMSO
NS : 2200
DS : 4
SWH : 24038.461 Hz
FIDRES : 0.731936 Hz
AQ : 1.3631488 sec
RG : 137.77
DE : 20.800 umsec
TE : 4.50 umsec
TS : 284.5 K
D1 : 2.0000000 sec
d11 : 0.0300000 sec
TD0 : 1
SFO1 : 100.6404331 MHz
NUC1 : 13C
P1 : 16.00 umsec
PLW1 : 47.0000000 W
SFO2 : 400.1418008 MHz
NUC2 : 1H
PCPD2 : 90.00 umsec
PLW2 : 13.0000000 W
PLW12 : 0.29249999 W
PLW13 : 0.14713000 W
F2 - Processing parameters
SI : 32768
SF : 100.6303700 MHz
WDW : EM
SSB : 0
LB : 1.00 Hz
GB : 0
PC : 1.00
  
```

D-rabab-15 -1H

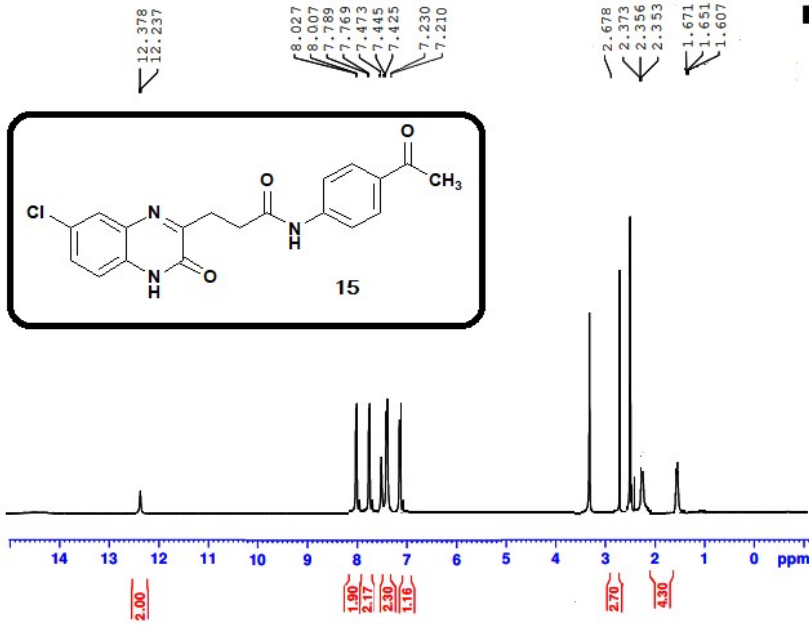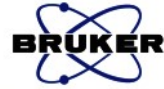

```

Current Data Parameters
NAME: D-rabab-15-1H
EXPNO: 1
PROCNO: 1
F2 - Acquisition Parameters
Date_ 201208
Time: 11.20
INSTRUM: spect
PROBHD: 5 mm PABBO
PULPROG: zgpg30
SOLVENT: dms
AQ: 4.00000000
RG: 327.50
SI: 3275
SF: 400.1426100
WDW: EM
SSB: 0
LB: 3.00
GB: 0
PC: 1.00000000
===== CHANNEL f1 =====
NUC1: 13C
P1: 19.00
PCPD: 12.00000000
F2 - Processing parameters
SI: 3275
SF: 400.1426100
WDW: EM
SSB: 0
LB: 3.00
GB: 0
PC: 1.00
  
```

D-rabab-15 - D2O

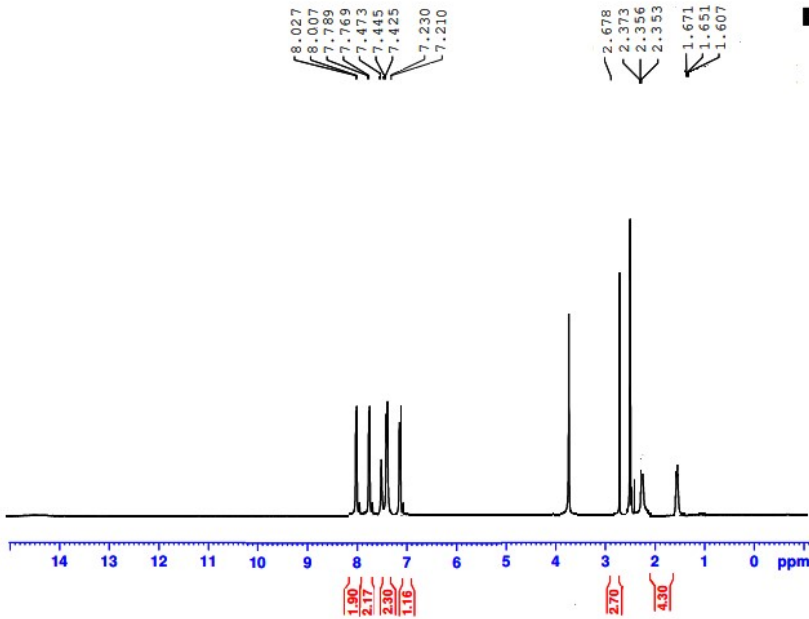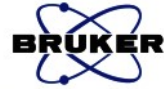

```

Current Data Parameters
NAME: D-rabab-15-D2O
EXPNO: 1
PROCNO: 1
F2 - Acquisition Parameters
Date_ 201208
Time: 11.20
INSTRUM: spect
PROBHD: 5 mm PABBO
PULPROG: zgpg30
SOLVENT: d2o
AQ: 4.00000000
RG: 327.50
SI: 3275
SF: 400.1426100
WDW: EM
SSB: 0
LB: 3.00
GB: 0
PC: 1.00000000
===== CHANNEL f1 =====
NUC1: 13C
P1: 19.00
PCPD: 12.00000000
F2 - Processing parameters
SI: 3275
SF: 400.1426100
WDW: EM
SSB: 0
LB: 3.00
GB: 0
PC: 1.00
  
```

Rabab - 15 - C13

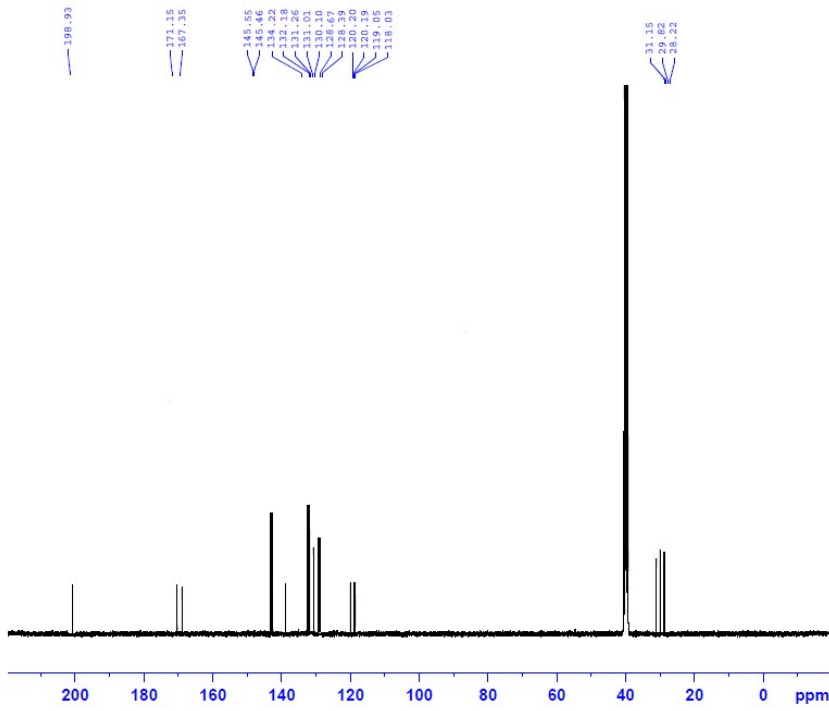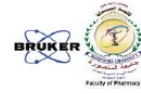

Current Data Parameters  
 NAME Rabab Al Said - M1 - Char-DMO-5  
 EXPO 10  
 PROCNO 1

F2 - Acquisition Parameters  
 Date: 20190318  
 Time: 14.16 h  
 INSTRUM spect  
 PROBRD Z106418\_0915 (1  
 PULPROG zgpg30  
 TD 65536  
 SOLVENT DMSO  
 NS 2200  
 DS 4  
 SWE 24038.461 Hz  
 FIDRES 0.73396 Hz  
 AQ 1.1631488 sec  
 RG 197.77  
 DW 20.800 usec  
 DE 6.50 usec  
 TE 294.2 K  
 D1 2.00000000 sec  
 D11 0.03000000 sec  
 TDO 1  
 SFO1 100.640433 MHz  
 NUC1 13C  
 P1 10.00 usec  
 PL1 47.00000000 W  
 SFO2 400.201608 MHz  
 NUC2 1H  
 CPDPRG2 waltz16  
 DPCD2 90.00 usec  
 PLM2 13.00000000 W  
 PLM12 0.23249999 W  
 PLM13 0.14713000 W

F2 - Processing parameters  
 SI 32768  
 SF 100.630700 MHz  
 MDW EM  
 GB 0  
 LB 1.00 Hz  
 CB 0  
 PC 1.40

D-rabab-16 -1H

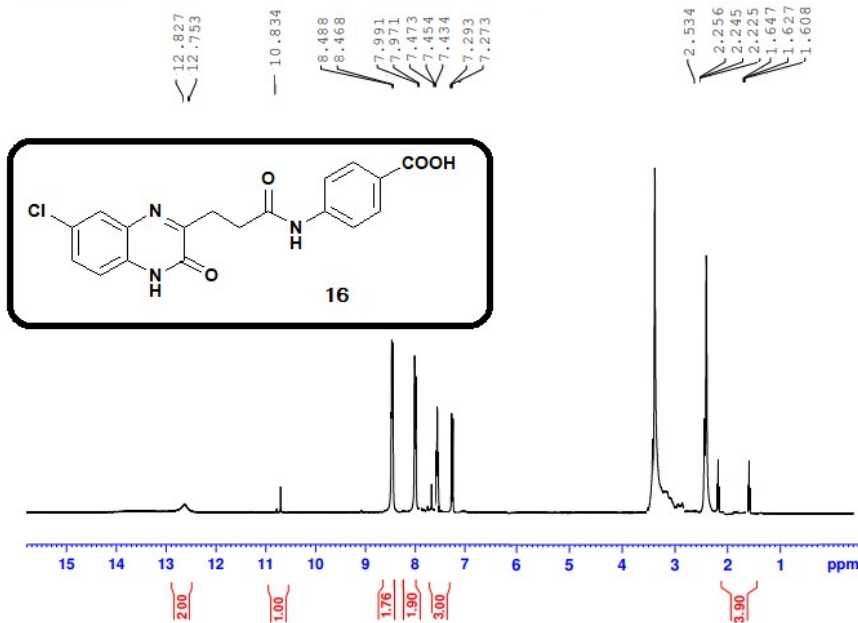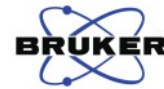

Current Data Parameters  
 NAME D-rabab-16-1H  
 EXPO 10  
 PROCNO 1

F2 - Acquisition Parameters  
 Date: 20191103  
 Time: 21.58  
 INSTRUM spect  
 PROBRD Z106418\_0915 (1  
 PULPROG zgpg30  
 TD 65536  
 SOLVENT DMSO  
 NS 2200  
 DS 4  
 SWE 24038.461 Hz  
 FIDRES 0.73396 Hz  
 AQ 1.1631488 sec  
 RG 197.77  
 DW 20.800 usec  
 DE 6.50 usec  
 TE 294.2 K  
 D1 2.00000000 sec  
 D11 0.03000000 sec  
 TDO 1  
 SFO1 100.640433 MHz  
 NUC1 13C  
 P1 10.00 usec  
 PL1 47.00000000 W  
 SFO2 400.201608 MHz  
 NUC2 1H  
 CPDPRG2 waltz16  
 DPCD2 90.00 usec  
 PLM2 13.00000000 W  
 PLM12 0.23249999 W  
 PLM13 0.14713000 W

F2 - Processing parameters  
 SI 32768  
 SF 100.630700 MHz  
 MDW EM  
 GB 0  
 LB 1.00 Hz  
 CB 0  
 PC 1.40

D-rabab-16 - D2O

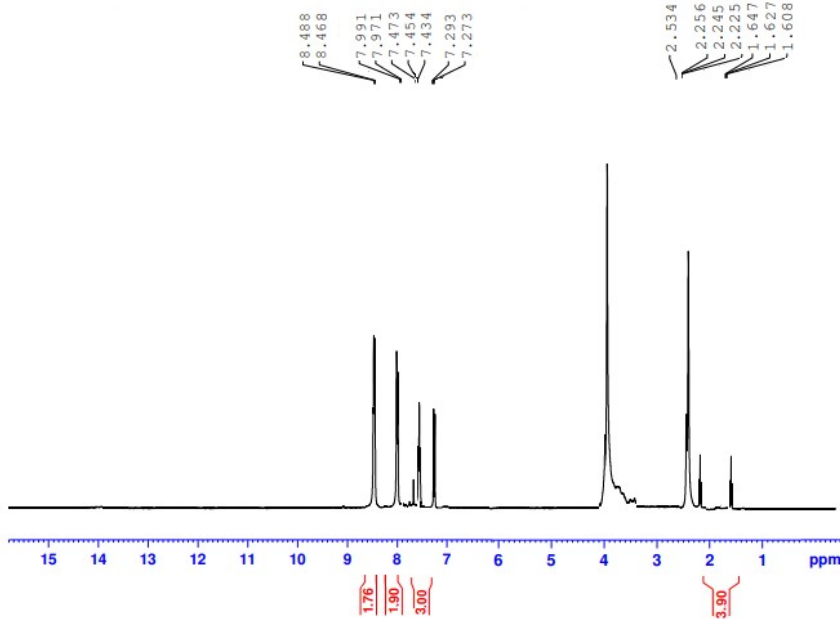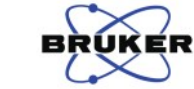

```

Current Data Parameters
NAME: D-rabab-16-D2O
PROCNO: 1
F2 - Acquisition Parameters
Date_: 20111213
Time: 13.11
INSTRUM: spect
PROBHD: 5 mm QNP1H
PULPROG: zgpg30
TE: 300.2
SOLVENT: DMSO
NS: 1024
DS: 4
SWH: 13113.000 MHz
FIDRES: 0.320000 MHz
AQ: 0.3110000000
RG: 327.50
DE: 1.90 mm
TE2: 300.2 K
TD: 65536
SFO: 500.1360000 MHz
===== CHANNEL f1 =====
NUC1: 13C
P1: 12.00000000
PL1: 0.00000000
PCPD1: 10.00000000 W
===== CHANNEL f2 =====
NUC2: 1H
P2: 12.00000000
PL2: 0.00000000
PCPD2: 10.00000000 W
===== Processing parameters =====
SI: 32768
SF: 500.1360000 MHz
WDW: EM
SSB: 0
LB: 3.00 Hz
GB: 0
PC: 1.00
  
```

D-rabab-16 -c13

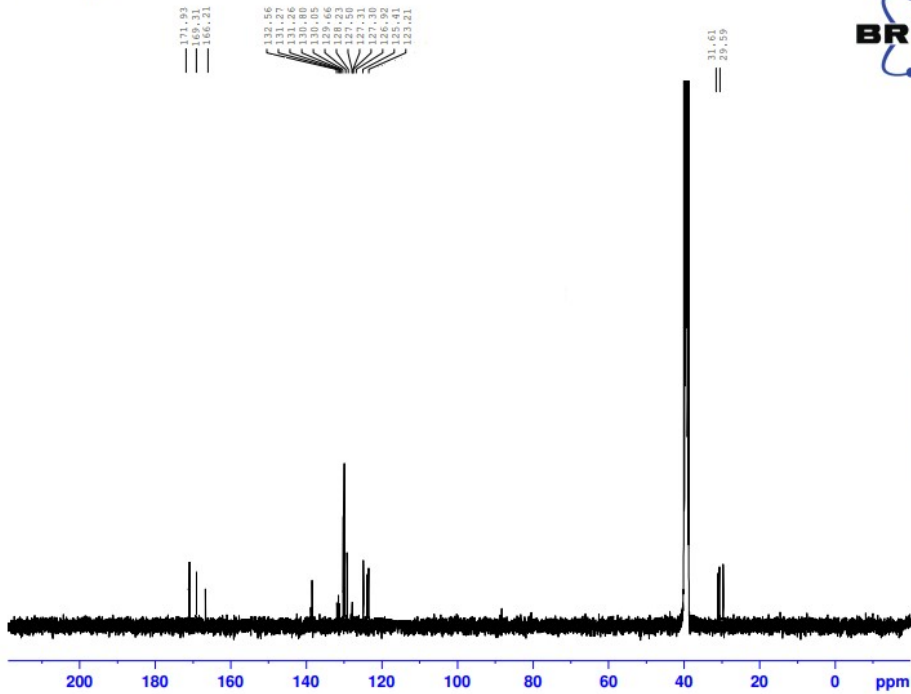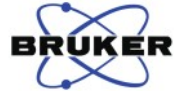

```

Current Data Parameters
NAME: D-rabab-16-c13
PROCNO: 1
F2 - Acquisition Parameters
Date_: 20111213
Time: 13.11
INSTRUM: spect
PROBHD: 5 mm QNP1H
PULPROG: zgpg30
TE: 300.2
SOLVENT: DMSO
NS: 1024
DS: 4
SWH: 13113.000 MHz
FIDRES: 0.320000 MHz
AQ: 0.3110000000
RG: 327.50
DE: 1.90 mm
TE2: 300.2 K
TD: 65536
SFO: 500.1360000 MHz
===== CHANNEL f1 =====
NUC1: 13C
P1: 12.00000000
PL1: 0.00000000
PCPD1: 10.00000000 W
===== CHANNEL f2 =====
NUC2: 1H
P2: 12.00000000
PL2: 0.00000000
PCPD2: 10.00000000 W
===== Processing parameters =====
SI: 32768
SF: 500.1360000 MHz
WDW: EM
SSB: 0
LB: 3.00 Hz
GB: 0
PC: 1.00
  
```

D-rabab- 17 -1H

11.922  
11.899

8.120  
8.099  
7.946  
7.518  
7.497  
7.432  
7.411  
6.496  
6.475  
4.384  
4.366  
4.349  
4.331  
3.320  
2.358  
2.338  
2.330  
1.755  
1.735  
1.705  
1.363  
1.343  
1.325

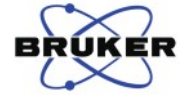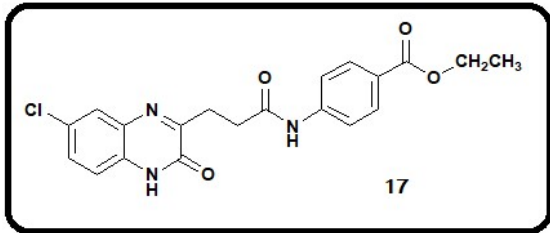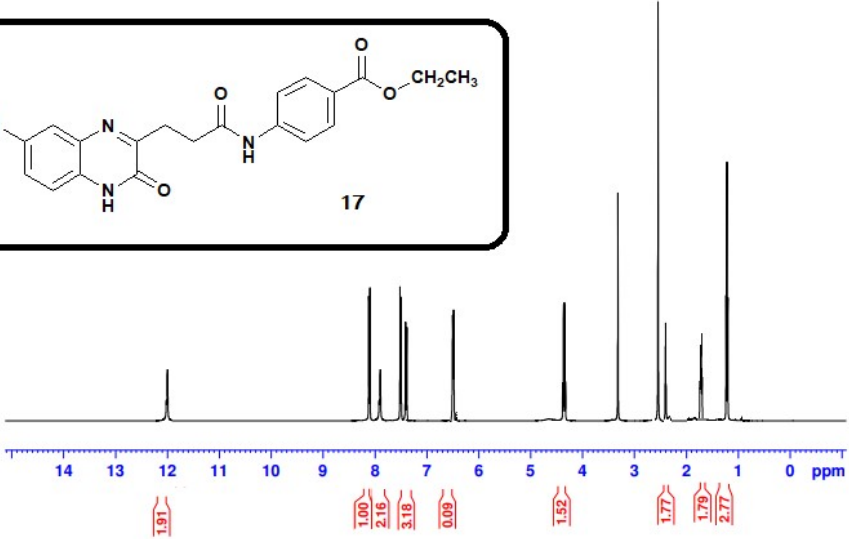

```

Current Data Parameters
NAME: D-rabab-17a-1H
EXPNO: 10
PROCNO: 1

F2 - Acquisition Parameters
Date_: 20111228
Time: 11.00
INSTRUM: spect
PROBHD: 5 mm PABBO BBO/
PULPROG: zgpg30
TD: 65536
SOLVENT: DMSO
NS: 2
DS: 4
SWH: 8012.820 Hz
FIDRES: 0.122244 Hz
AQ: 4.089445 sec
RG: 143.43
SQ: 62.450 sec
SR: 4.20 sec
TR: 298.15
TE: 1.00000000 sec
TD0: 1

===== CHANNEL f1 =====
NUC1: 13C
P1: 15.00 sec
PL1: 10.39999962 W

F2 - Processing parameters
SI: 32768
SF: 400.1300038 MHz
WDW: EM
SSB: 0
GB: 0.30 Hz
PC: 1.00

```

D-rabab- 17 - D2O

8.120  
8.099  
7.946  
7.518  
7.497  
7.432  
7.411  
6.496  
6.475  
4.384  
4.366  
4.349  
4.331  
3.320  
2.358  
2.338  
2.330  
1.755  
1.735  
1.705  
1.363  
1.343  
1.325

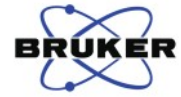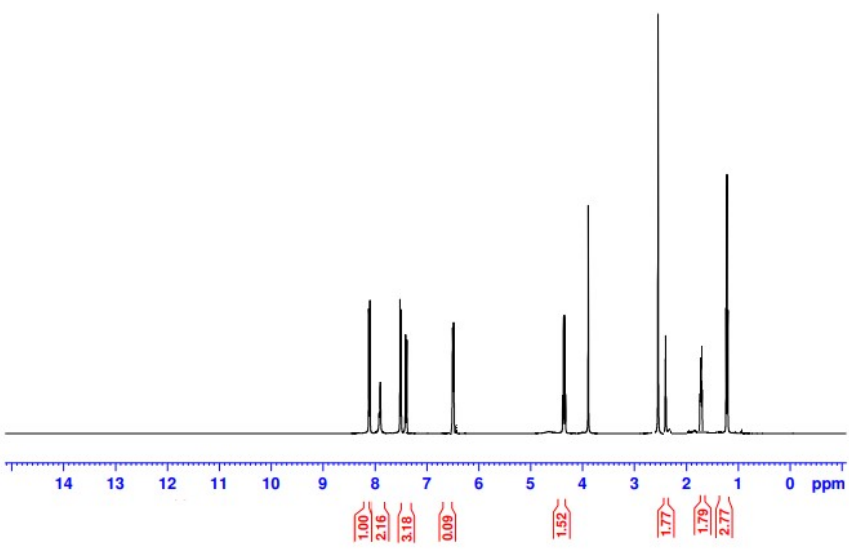

```

Current Data Parameters
NAME: D-rabab-17a-1H
EXPNO: 10
PROCNO: 1

F2 - Acquisition Parameters
Date_: 20111228
Time: 11.00
INSTRUM: spect
PROBHD: 5 mm PABBO BBO/
PULPROG: zgpg30
TD: 65536
SOLVENT: DMSO
NS: 2
DS: 4
SWH: 8012.820 Hz
FIDRES: 0.122244 Hz
AQ: 4.089445 sec
RG: 143.43
SQ: 62.450 sec
SR: 4.20 sec
TR: 298.15
TE: 1.00000000 sec
TD0: 1

===== CHANNEL f1 =====
NUC1: 13C
P1: 15.00 sec
PL1: 10.39999962 W

F2 - Processing parameters
SI: 32768
SF: 400.1300038 MHz
WDW: EM
SSB: 0
GB: 0.30 Hz
PC: 1.00

```

D-rabab-17 -c13

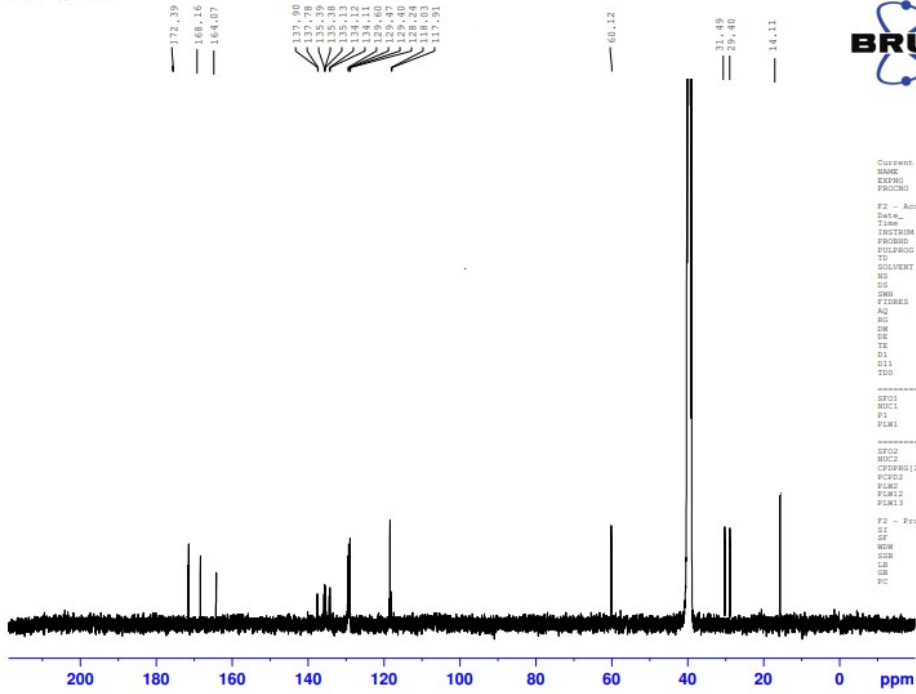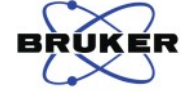

```
Current Data Parameters
NAME      D-rabab-17-c13
EXPNO     20
PROCNO    1

F2 - Acquisition Parameters
Date_     20210901
Time      8.53
INSTRUM   spect
PROBHD    5 mm PABBO BB/
PULPROG   zgpg30
TD         65536
SOLVENT   DMF
NS         10000
DS         4
SWH        24038.461 Hz
FIDRES     0.366798 Hz
AQ         1.3631488 sec
RG         201.61
DM         29.800 usec
DE         6.50 usec
TE         298.2 K
D1         2.0000000 sec
d11        0.2000000 sec
TD0        1

===== CHANNEL f1 =====
SFO1      100.6282633 MHz
NUC1       13C
P1         10.00 usec
PLM1       50.0000000 M

===== CHANNEL f2 =====
SFO2      400.1316055 MHz
NUC2       1H
CPCPRG2   waltz16
PCPD2     90.00 usec
PLM2      10.39999962 M
PLM3      0.28889000 M
PLM13     0.23400000 M

F2 - Processing parameters
SI         32768
SF         100.6138151 MHz
WDW        EM
SSB        0
LB         1.00 Hz
GB         0
PC         1.40
```

D-rabab-19-c13

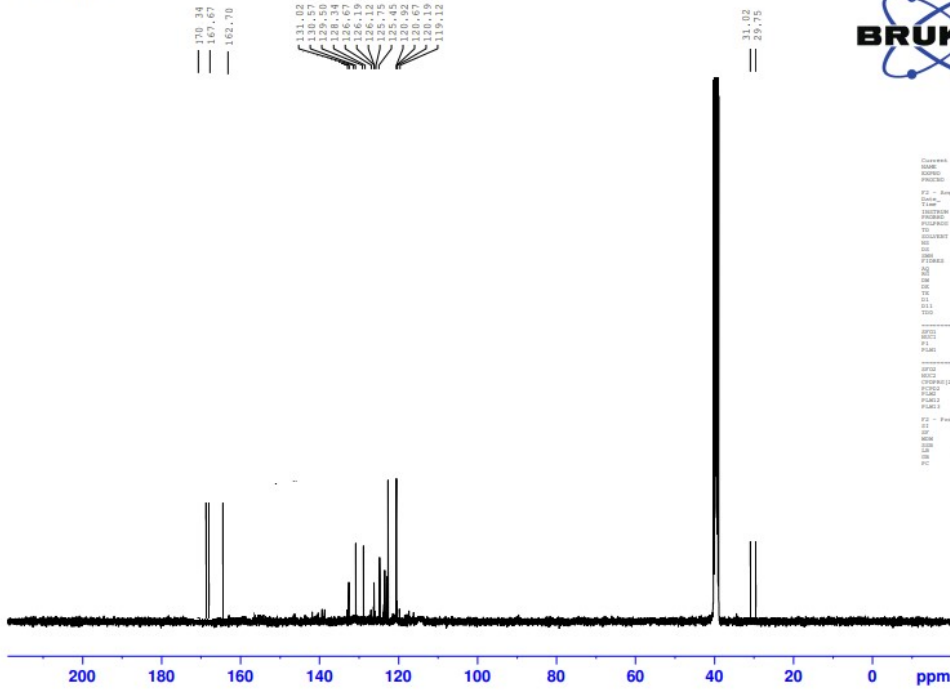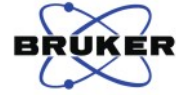

```

Current Data Parameters
NAME      D-rabab-19-c13
EXPNO    10
PROCNO   1
F2 - Acquisition Parameters
Date_    20211003
Time     11:10
INSTRUM  spect
PROBHD   5 mm mmag2 401
PULPROG  zgpg30
TD        65536
SOLVENT  DMSO
NS        16
DS        2
SWH       8012.820 Hz
FIDRES   0.244532 Hz
AQ        4.0894465 sec
RG        137.77
DW        62.400 usec
DE        6.50 usec
TE        296.6 K
D1        1.0000000 sec
TDO       1
SFO1     400.2024712 MHz
NUC1      13
P1        13.50 usec
PL1       13.0000000 W
F2 - Processing parameters
SI        65536
SF        400.2000000 MHz
WDW       EM
SSB       0
LB        0.30 Hz
GB        0
PC        1.00
    
```

D-rabab- 20 -M hnmr

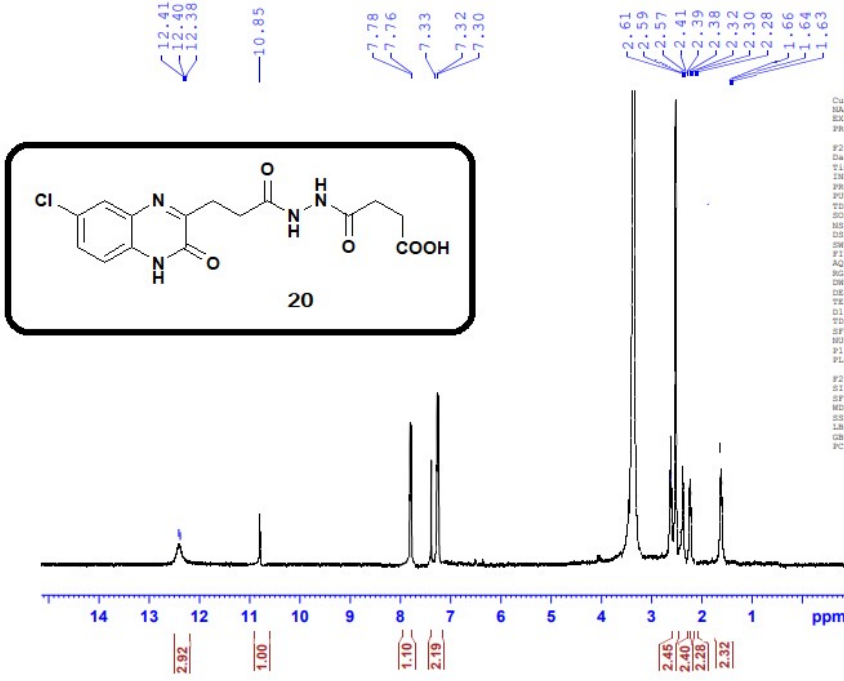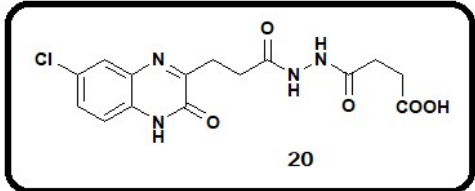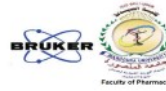

```

Current Data Parameters
NAME      D-rabab-20
EXPNO    10
PROCNO   1
F2 - Acquisition Parameters
Date_    20210913
Time     11:10 h
INSTRUM  spect
PROBHD   Z108618_0945 (
PULPROG  zgpg30
TD        65536
SOLVENT  DMSO
NS        16
DS        2
SWH       8012.820 Hz
FIDRES   0.244532 Hz
AQ        4.0894465 sec
RG        137.77
DW        62.400 usec
DE        6.50 usec
TE        296.6 K
D1        1.0000000 sec
TDO       1
SFO1     400.2024712 MHz
NUC1      13
P1        13.50 usec
PL1       13.0000000 W
F2 - Processing parameters
SI        65536
SF        400.2000000 MHz
WDW       EM
SSB       0
LB        0.30 Hz
GB        0
PC        1.00
    
```



D-rabab- 20 -D2O

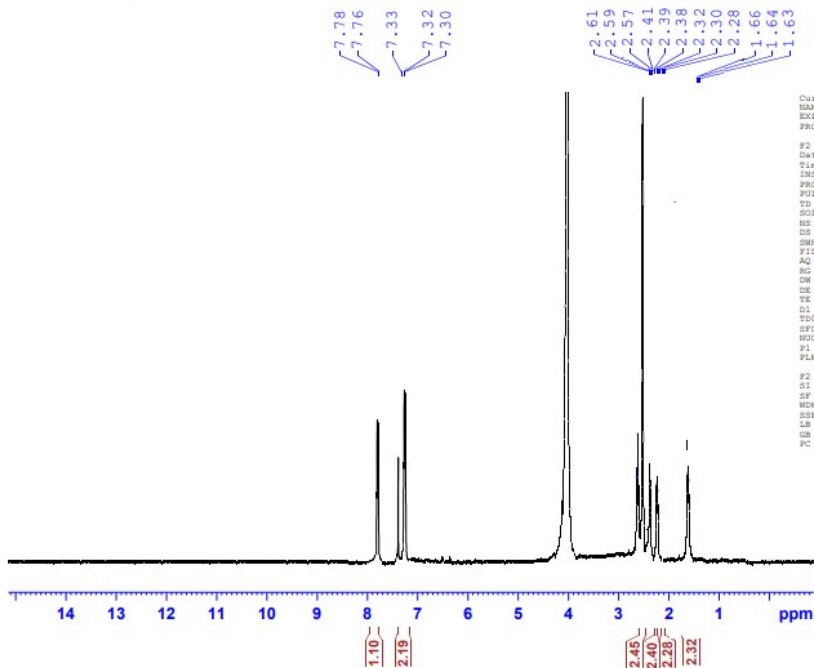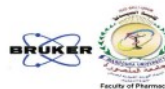

Current Data Parameters  
NAME  
EXPRO 10  
PROCNO 1

F2 - Acquisition Parameters  
Date 20210913  
Time 11:10 h  
INSTRUM spect  
PROBHD 1H0618\_0945 (6  
PULPROG zg30  
TD 65536  
SOLVENT DMSO  
MS 16  
DS 2  
SWH 8012.820 Hz  
FIDRES 0.244532 Hz  
AQ 4.0894465 sec  
RG 197.77  
DM 62.400 usec  
DE 6.50 usec  
TE 296.6 K  
D1 1.00000000 sec  
TD0 1  
SFO1 400.202412 MHz  
NUC1 1H  
P1 13.50 usec  
PL1 13.0000000 W

F2 - Processing parameters  
SI 65536  
SF 400.2000000 MHz  
WDW EM  
SSB 0  
LB 0.30 Hz  
GB 0  
PC 1.00

D-rabab-20 -c13

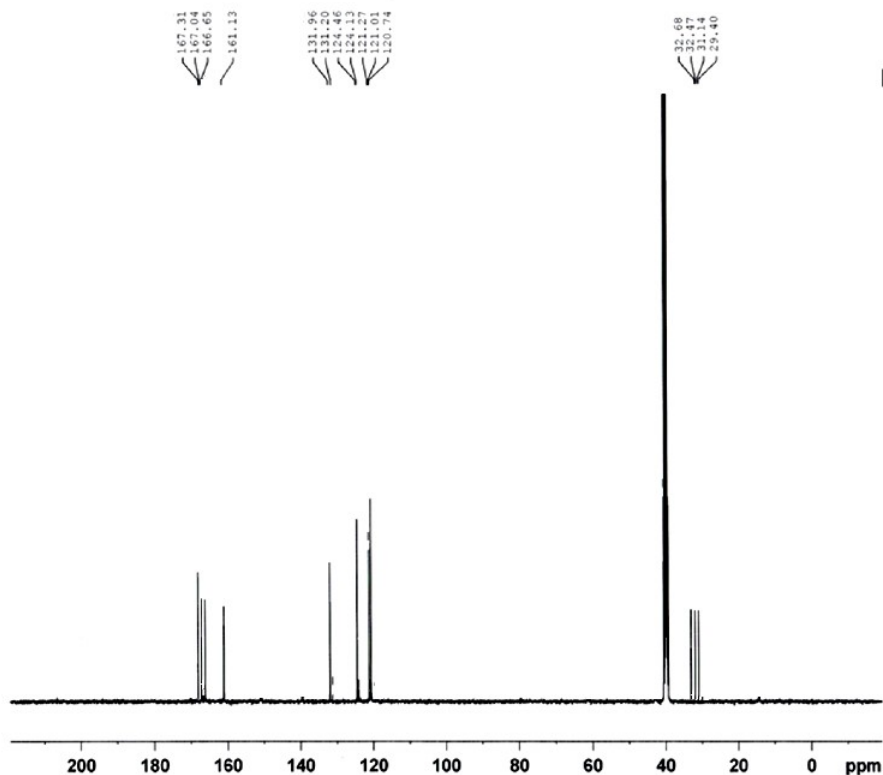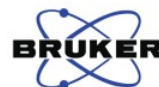

Current Data Parameters  
NAME D-rabab-20-c13  
EXPRO 10  
PROCNO 1

F2 - Acquisition Parameters  
Date 20210913  
Time 11:10 h  
INSTRUM spect  
PROBHD 1H0618\_0945 (6  
PULPROG zgpg30  
TD 65536  
SOLVENT DMSO  
MS 16  
DS 2  
SWH 10131.510 Hz  
FIDRES 0.10000000 Hz  
AQ 4.0894465 sec  
RG 197.77  
DM 62.400 usec  
DE 6.50 usec  
TE 296.6 K  
D1 1.00000000 sec  
TD0 1  
SFO1 100.621152 MHz  
NUC1 13C  
P1 13.50 usec  
PL1 0.0000000 W

F2 - Processing parameters  
SI 65536  
SF 100.621152 MHz  
WDW EM  
SSB 0  
LB 0.30 Hz  
GB 0  
PC 1.00

D-rabab- 21 -M hnmr

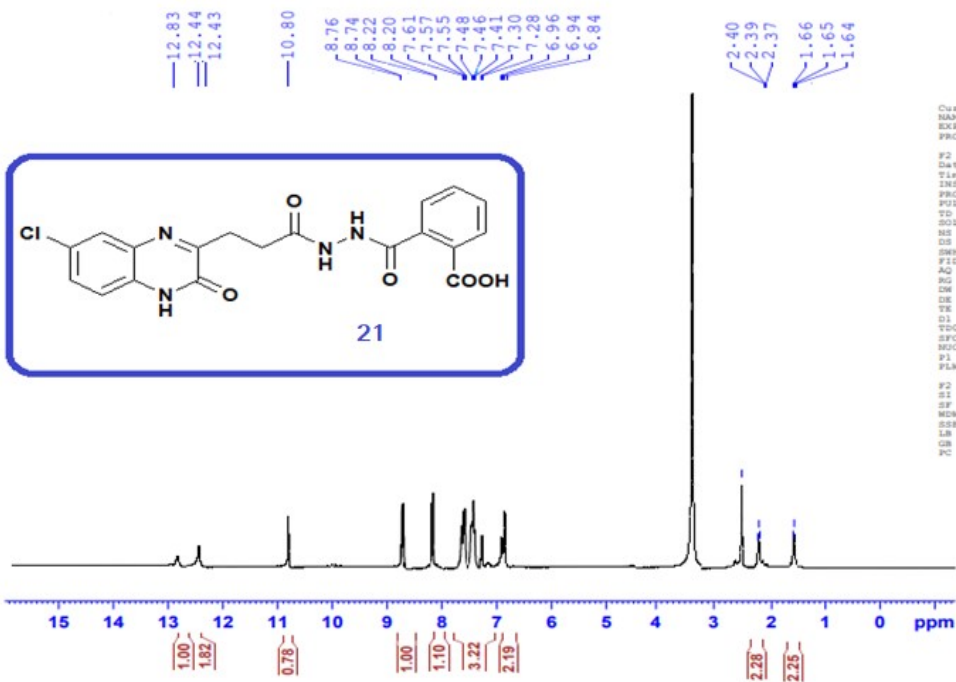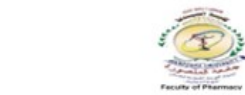

Current Data Parameters  
NAME Safeya mossa 21 -M hnmr  
EXPNO 10  
PROCNO 1

F2 - Acquisition Parameters  
Date\_ 20210913  
Time\_ 10.55 h  
INSTRUM spect  
PROBHD 210618\_0945 G  
PULPROG zg30  
TD 65536  
SOLVENT DMSO  
NS 16  
DS 2  
SWH 8012.820 Hz  
FIDRES 0.244532 Hz  
AQ 4.058465 sec  
RG 135.42  
DE 62.400 usec  
UE 6.50 usec  
TE 295.9 K  
TDO 1.0000000 sec  
SFO1 400.2024112 MHz  
NUC1 1H  
P1 11.50 usec  
PLM1 13.0000000 W

F2 - Processing parameters  
SI 65536  
SF 400.2000000 MHz  
NRM RM  
SSB 0  
LB 0.30 Hz  
GB 0  
PC 1.00

D-rabab- 21 - D2O

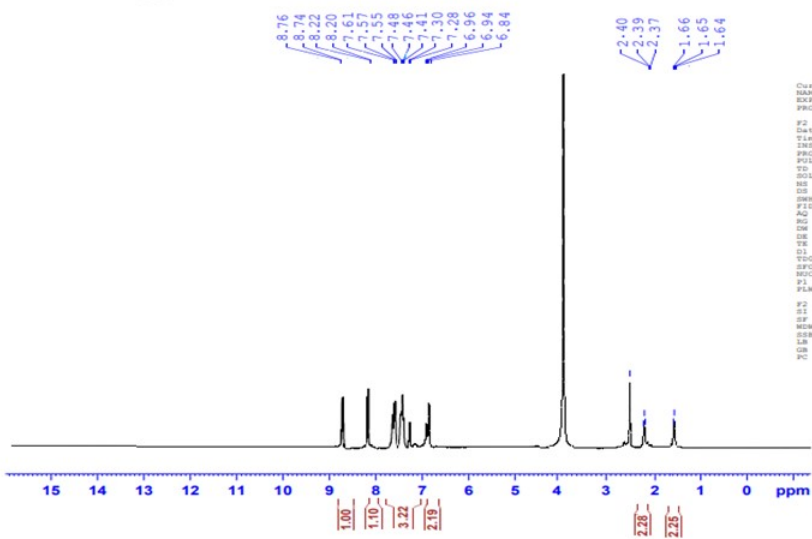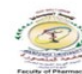

```

Current Data Parameters
NAME: Safaya_msa_11 -H nmr
EXPNO: 10
PROCNO: 1

F2 - Acquisition Parameters
Date_: 20210313
Time: 10.55 h
INSTRUM: spect
PROBHD: zgpg30
PULPROG: zgpg30
SOLVENT: DMSO
NS: 16
DS: 2
SWH: 8012.820 Hz
FIDRES: 0.244132 Hz
AQ: 4.082465 sec
RG: 32.42
DE: 27.400 umol
TE: 299.2 K
D1: 1.00000000 sec
SFO1: 400.2024712 MHz
NUC1: 13
P1: 13.50 umol
PL1: 13.0000000 W

F2 - Processing parameters
SI: 400.2024712 MHz
SF: 400.2024712 MHz
WDW: EM
SSB: 0
LB: 0.30 Hz
GB: 0
PC: 1.00
    
```

D-rabab- 21 -- c13

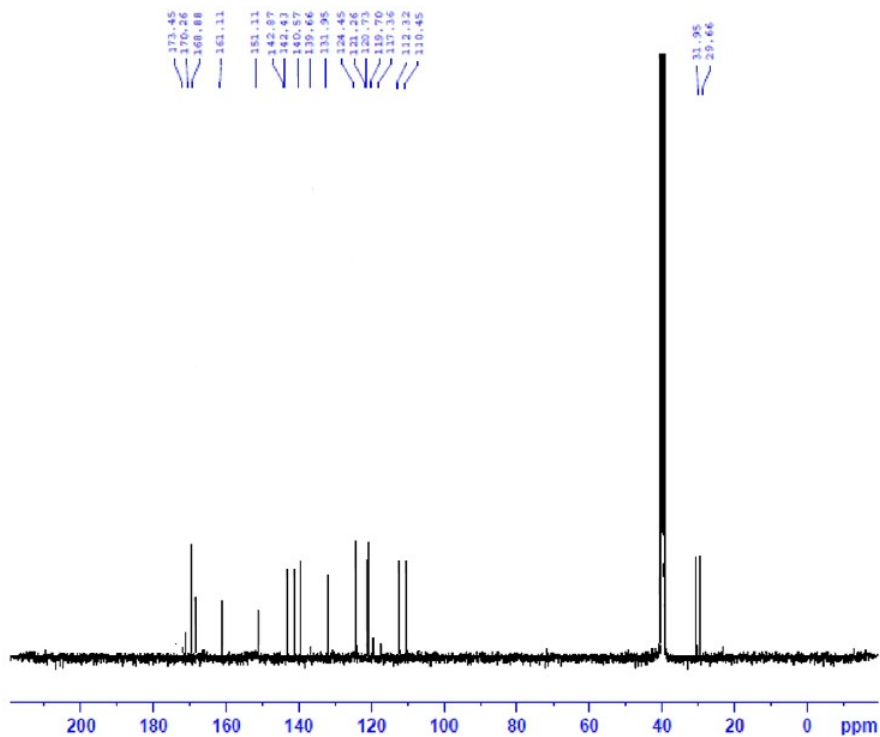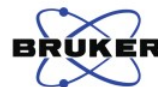

```

Current Data Parameters
NAME: Safaya_msa_11
EXPNO: 10
PROCNO: 1

F2 - Acquisition Parameters
Date_: 20210313
Time: 10.55 h
INSTRUM: spect
PROBHD: zgpg30
PULPROG: zgpg30
SOLVENT: DMSO
NS: 16
DS: 2
SWH: 8012.820 Hz
FIDRES: 0.244132 Hz
AQ: 4.082465 sec
RG: 32.42
DE: 27.400 umol
TE: 299.2 K
D1: 1.00000000 sec
SFO1: 400.2024712 MHz
NUC1: 13
P1: 13.50 umol
PL1: 13.0000000 W

F2 - Processing parameters
SI: 400.2024712 MHz
SF: 400.2024712 MHz
WDW: EM
SSB: 0
LB: 0.30 Hz
GB: 0
PC: 1.00
    
```
